# Supplementary material for: Combining electron transfer, spin crossover, and redox properties in metal-organic frameworks
Source: PubMed Central journal article supplement — Nat Commun. 2024 Aug 21;15:7192. doi: 10.1038/s41467-024-51385-8 (PMC11339071; doi:10.1038/s41467-024-51385-8), 2024-08-21
Supplement: 41467_2024_51385_MOESM1_ESM.pdf [file 41467_2024_51385_MOESM1_ESM.pdf]

## **SUPPLEMENTARY INFORMATION**

### **Combining Electron Transfer, Spin Crossover, and Redox**

#### **Properties in Metal-Organic Frameworks**

Livia Getzner<sup>1</sup>, Damian Paliwoda<sup>1</sup>, Laure Vendier<sup>1</sup>, Latévi Max Lawson-Daku<sup>2</sup>, Aurelian Rotaru<sup>3</sup>, Gábor Molnár<sup>1</sup>, Saioa Cobo<sup>1\*</sup> and Azzedine Bousseksou<sup>1\*</sup>

<sup>1</sup> LCC, CNRS and Université de Toulouse, UPS, INP, Toulouse, France

<sup>2</sup> Faculté des Sciences – Université de Genève, 30 quai Ernest Ansermet, CH-1211 Genève 4, Suisse, Switzerland

<sup>3</sup> Department of Electrical Engineering and Computer Science & Research Center MANSiD, Stefan cel Mare University of Suceava, University St., No. 13, 720229 Suceava, Romania

## **Contents**

|                                 |    |
|---------------------------------|----|
| 1 Supplementary Methods.....    | 3  |
| 2 Supplementary Figures.....    | 9  |
| 3 Supplementary Discussion..... | 27 |
| 4 Supplementary Tables.....     | 37 |
| 5 Supplementary References..... | 42 |

# 1 Supplementary Methods

## 1.1 Synthesis of Ligands

### 1.1.1 Synthesis of 1-(2,4-Dinitrophenyl)-[4,4'-bipyridin]-1-ium chloride (di-NO<sub>2</sub>-pbpyCl)

Dissolve 20 mmol (3.12 g) 4,4'-bipyridine and 20 mmol (4.05 g) 2,4-dinitrochlorobenzene in 50 ml acetone and stir at reflux for 12 h, cool, filter the precipitate that formed during reaction and wash multiple times with acetone. The beige powder **di-NO<sub>2</sub>-pbpyCl** was obtained with 77 % yield.

<sup>1</sup>H NMR (300 MHz, DMSO) δ 9.58 (d, *J* = 7.1 Hz, 2H), 9.16 (d, *J* = 2.5 Hz, 1H), 9.01 (dd, *J* = 8.7, 2.5 Hz, 1H), 8.98 – 8.92 (m, 4H), 8.46 (d, *J* = 8.7 Hz, 1H), 8.20 (d, *J* = 6.2 Hz, 2H). MS (ESI) *m/z*: Calc. for [M]<sup>+</sup> C<sub>16</sub>H<sub>11</sub>N<sub>4</sub>O<sub>4</sub> 323.08. Found. 323.17.

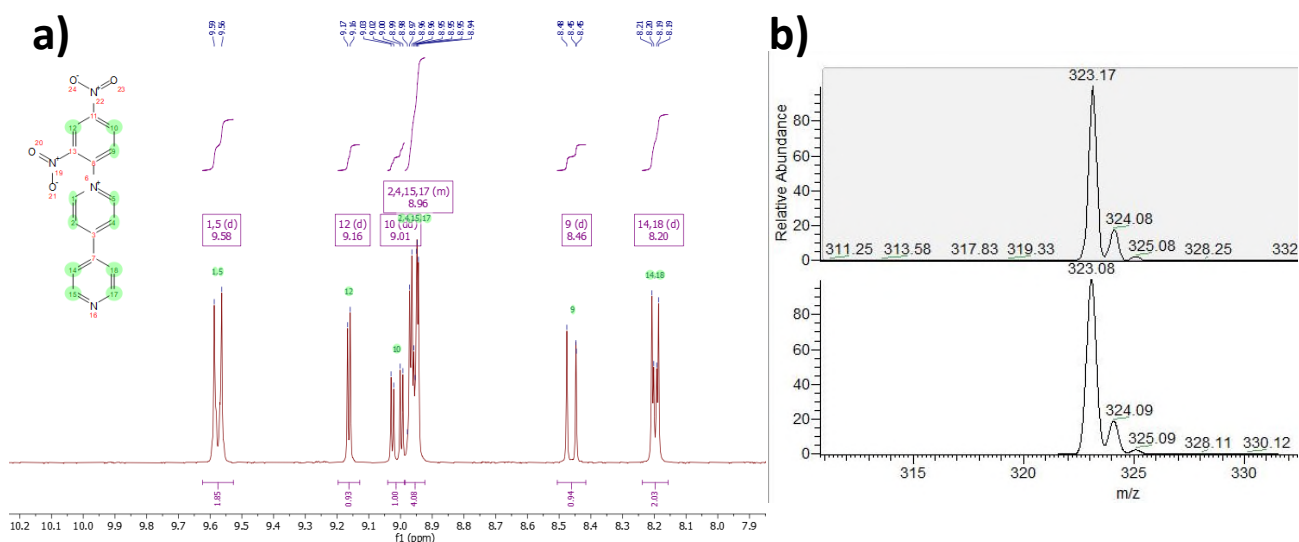

Supplementary Figure 1: (a) <sup>1</sup>H NMR and (b) ESI-MS spectra (experimental and calculated) of **di-NO<sub>2</sub>-pbpy<sup>+</sup>**.

### 1.1.2 Synthesis of 1-(4-Methylphenyl)-[4,4'-bipyridin]-1-ium chloride ( $\text{CH}_3\text{-pbpyCl}$ ) (1)

Dissolve 2.75 mmol **di-NO<sub>2</sub>-pbpyCl** (1.00 g) in 15 ml of ethanol abs. and add 8.25 mmol 4-methylaniline (0.88 g), reflux for 4 h, cool and add 20 ml dist. H<sub>2</sub>O to remove byproduct as precipitate, evaporate all solvent and dissolve the crude product in as little methanol as possible, then precipitate **CH<sub>3</sub>-pbpyCl** in diethyl ether and wash multiple times with diethylether to remove impurities. Light beige powder **CH<sub>3</sub>-pbpyCl** was obtained with 91 % yield.

<sup>1</sup>H NMR (400 MHz, DMSO)  $\delta$  9.48 (d,  $J$  = 7.0 Hz, 2H), 8.92 (d,  $J$  = 6.2 Hz, 2H), 8.78 (d,  $J$  = 7.1 Hz, 2H), 8.16 (d,  $J$  = 6.2 Hz, 2H), 7.83 (d,  $J$  = 8.5 Hz, 2H), 7.58 (d,  $J$  = 8.1 Hz, 2H), 2.47 (s, 3H). MS (ESI)  $m/z$ : Calc. for  $[\text{M}]^+$  C<sub>17</sub>H<sub>15</sub>N<sub>2</sub> 247.12. Found. 247.17.

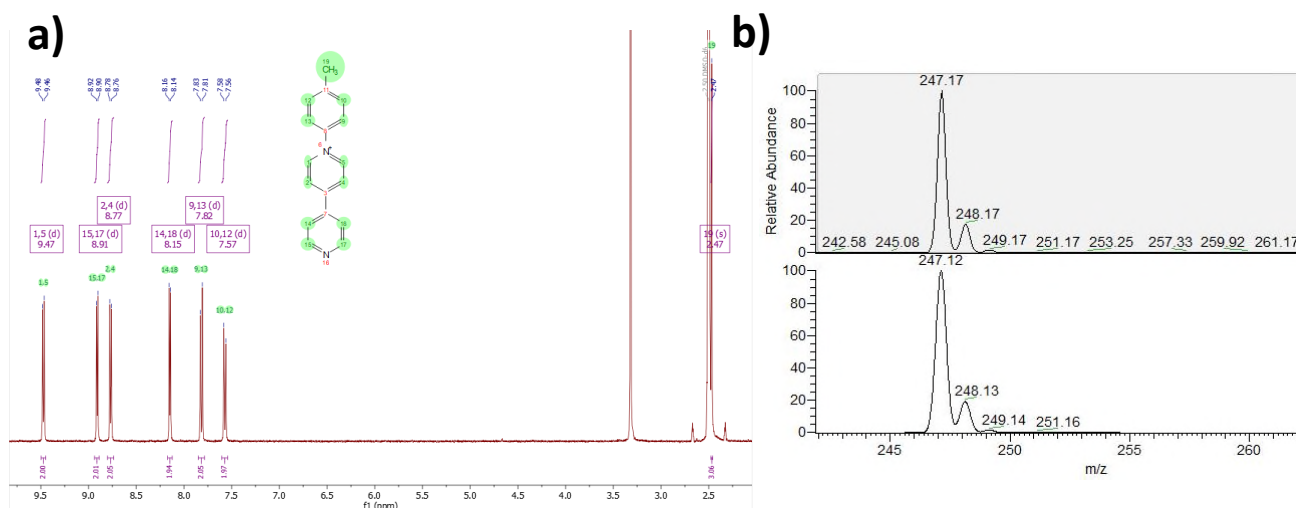

Supplementary Figure 2: (a) <sup>1</sup>H NMR and (b) ESI-MS spectra (experimental and calculated) of  $\text{CH}_3\text{-pbpy}^+$  (a).



### 1.1.3 Synthesis of 1-(4-Bromophenyl)-[4,4'-bipyridin]-1-ium chloride (Br-pbpyCl) (2)

Dissolve 3 mmol di-NO<sub>2</sub>-pbpyCl (1.07 g) in 15 ml of ethanol abs. and add 9 mmol 4-bromoaniline (1.55 g), reflux for 4 h, cool and add 20 ml dist. H<sub>2</sub>O to remove byproduct as precipitate, evaporate all solvent and dissolve crude product in as little methanol as possible, then precipitate Br-pbpyCl in diethyl ether and wash multiple times with diethylether to remove impurities. Light beige powder Br-pbpyCl was obtained with 93 % yield.

<sup>1</sup>H NMR (400 MHz, DMSO) δ 9.48 (d, *J* = 7.0 Hz, 2H), 8.91 (d, *J* = 6.2 Hz, 2H), 8.79 (d, *J* = 7.1 Hz, 2H), 8.15 (d, *J* = 6.2 Hz, 2H), 8.00 (d, *J* = 8.5 Hz, 2H), 7.90 (d, *J* = 8.1 Hz, 2H). MS (ESI) *m/z*: Calc. for [M]<sup>+</sup> C<sub>16</sub>H<sub>12</sub>N<sub>2</sub>Br 311.02 Found.311.17.

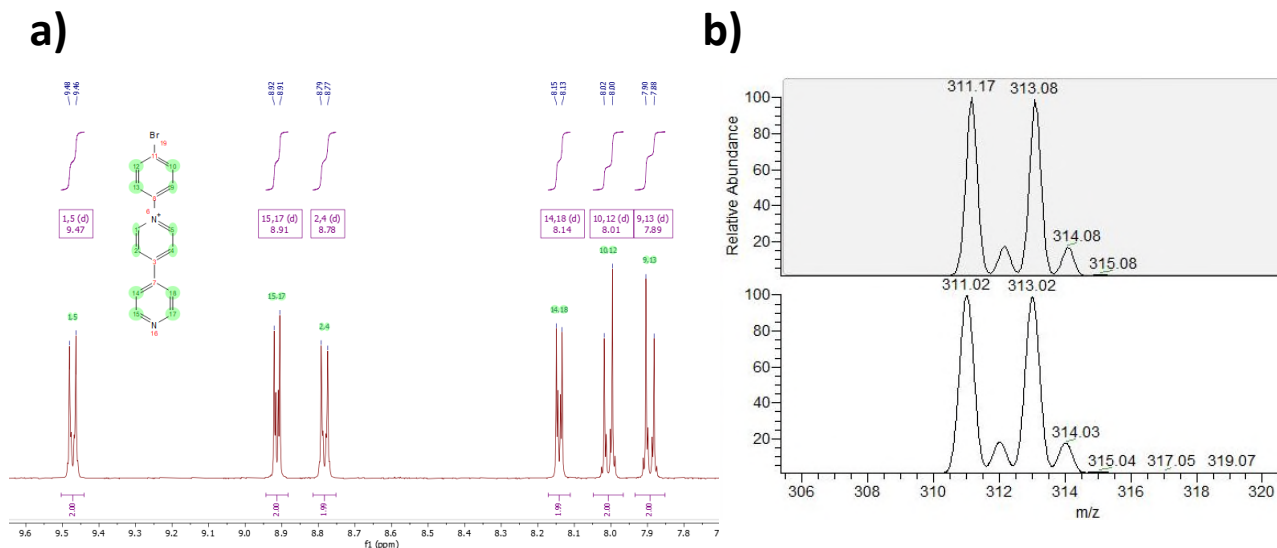

Supplementary Figure 3: (a) <sup>1</sup>H NMR and (b) ESI-MS spectra (experimental and calculated) of Br-pbpy<sup>+</sup> (a).

### 1.1.4 Synthesis of 1-(Methyl-4-aminobenzoate)-[4,4'-bipyridin]-1-ium chloride (COOCH<sub>3</sub>-pbpyCl) (3)

Dissolve 1.1 mmol **di-NO<sub>2</sub>-pbpyCl** (0.40 g) in 10 ml of ethanol abs. and add 3.3 mmol methyl-4-aminobenzoate (0.51 g) and 300  $\mu$ L triethylamine reflux for 4 h, cool and add 20 ml dist. H<sub>2</sub>O to remove byproduct as precipitate, evaporate all solvent and dissolve crude product in as little methanol as possible, then precipitate **COOCH<sub>3</sub>-pbpyCl** in diethyl ether and wash multiple times with diethylether to remove impurities. Light yellow powder **COOCH<sub>3</sub>-pbpyCl** was obtained with 66 % yield.

<sup>1</sup>H NMR (300 MHz, DMSO)  $\delta$  9.55 (d,  $J$  = 7.1 Hz, 2H), 8.92 (d,  $J$  = 6.2 Hz, 2H), 8.83 (d,  $J$  = 7.1 Hz, 2H), 8.31 (d,  $J$  = 8.8 Hz, 2H), 8.17 (d,  $J$  = 6.3 Hz, 2H), 8.09 (d,  $J$  = 8.8 Hz, 2H), 3.95 (s, 3H). MS (ESI)  $m/z$ : Calc. for [M]<sup>+</sup> C<sub>18</sub>H<sub>15</sub>N<sub>2</sub>O<sub>2</sub> 291.11. Found.291.25.

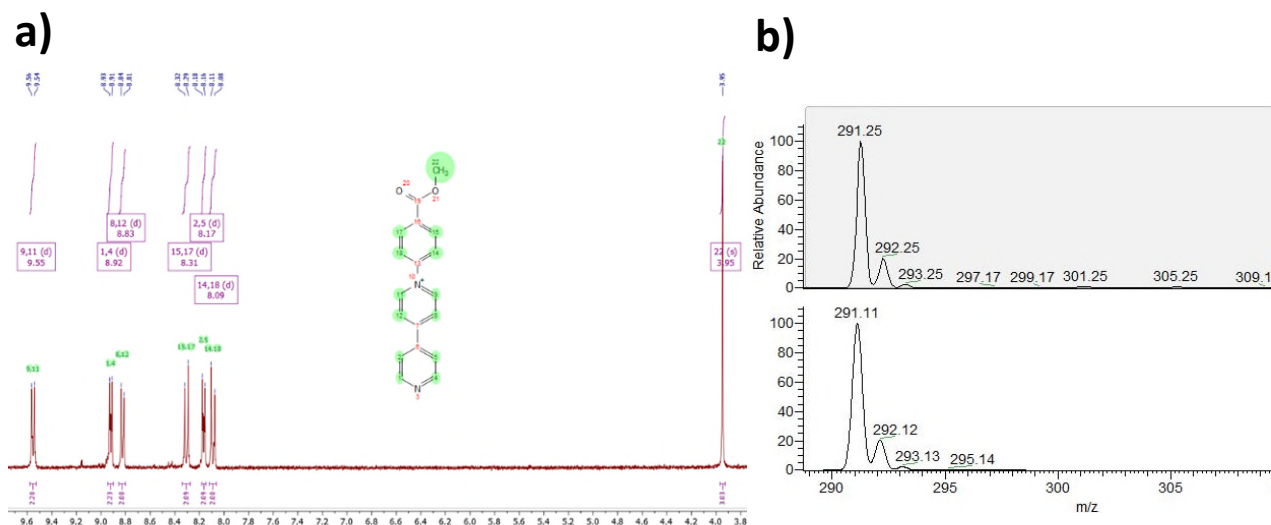

Supplementary Figure 4: (a) <sup>1</sup>H NMR and (b) ESI-MS spectra (experimental and calculated) of COOCH<sub>3</sub>-pbpy<sup>+</sup>.

### 1.1.5 Synthesis of 1-(4-Nitrophenyl)-[4,4'-bipyridin]-1-ium chloride ( $\text{NO}_2\text{-pbpyCl}$ ) (4)

Dissolve 1.0 mmol **di- $\text{NO}_2\text{-pbpyCl}$**  (0.36 g) in 10 ml of ethanol abs. and add 3 mmol 4-nitroaniline (0.41 g), reflux for 24 h, cool and add 20 ml dist.  $\text{H}_2\text{O}$  to remove byproduct as precipitate, evaporate all solvent and dissolve crude product in as little methanol as possible, then precipitate  **$\text{NO}_2\text{-pbpyCl}$**  in tetrahydrofuran (THF) and wash multiple times with THF to remove impurities. Yellow powder  **$\text{NO}_2\text{-pbpyCl}$**  was obtained with 60 % yield.

$^1\text{H NMR}$  (300 MHz, DMSO)  $\delta$  9.58 (d,  $J = 7.1$  Hz, 2H), 8.94 (d,  $J = 6.2$  Hz, 2H), 8.86 (d,  $J = 7.1$  Hz, 2H), 8.62 (d,  $J = 9.1$  Hz, 2H), 8.24 (d,  $J = 9.1$  Hz, 2H), 8.18 (d,  $J = 6.2$  Hz, 2H). MS (ESI)  $m/z$ : Calc. for  $[\text{M}]^+$   $\text{C}_{16}\text{H}_{12}\text{N}_3\text{O}_2$  278.09 Found.278.17.

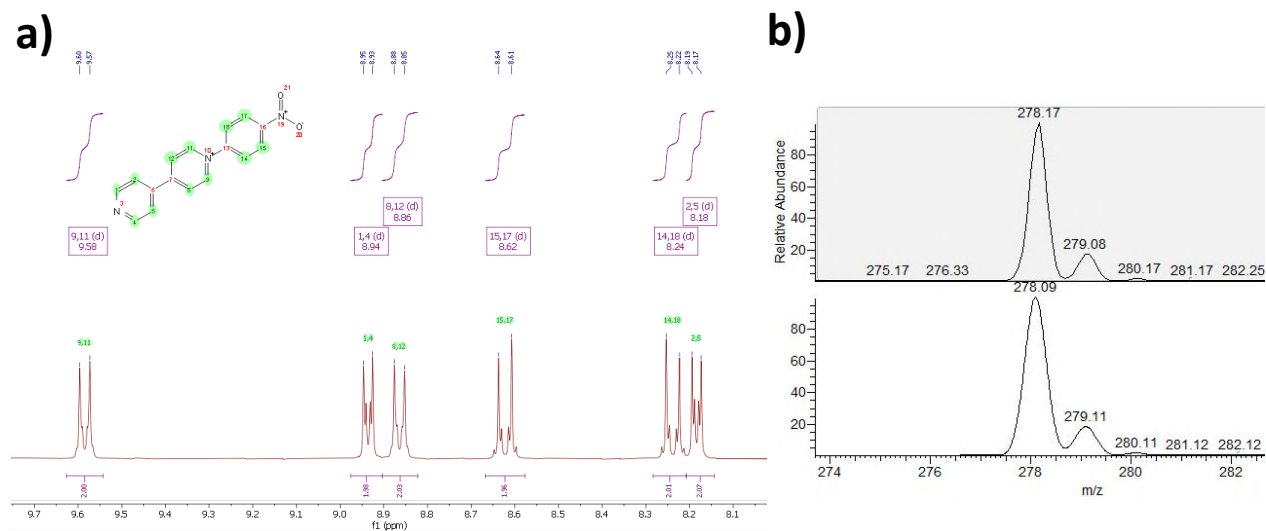

Supplementary Figure 5: (a)  $^1\text{H NMR}$  and (b) ESI-MS spectra (experimental and calculated) of  $\text{NO}_2\text{-pbpy}^+$ .

## 1.2 Synthesis of clathrates $\{\text{Fe}(\text{L})_2[\mu_2\text{-M}(\text{CN})_4]_2 \cdot x\text{H}_2\text{O}\}$ as powders (L= $\text{CH}_3\text{-pbpy}^+$ , $\text{COOCH}_3\text{-pbpy}^+$ , $\text{NO}_2\text{-pbpy}^+$ or $\text{Br-pbpy}^+$ ; M= Ni or Pt)

0.5 mmol of the respective ligand (L=  $\text{CH}_3\text{-pbpyCl}$ ,  $\text{COOCH}_3\text{-pbpyCl}$ ,  $\text{NO}_2\text{-pbpyCl}$  or  $\text{Br-pbpyCl}$ ) are dissolved in 10 mL 50/50 v% EtOH /  $\text{H}_2\text{O}$  dist., then 0.25 mmol of  $\text{Fe}(\text{BF}_4)_2 \cdot 6 \text{H}_2\text{O}$  are added with a small amount of ascorbic acid. Once dissolved, 0.5 mmol of  $\text{K}_2[\text{Ni}(\text{CN})_4] \cdot x \text{H}_2\text{O}$  or  $\text{K}_2[\text{Pt}(\text{CN})_4]$  are added and purple precipitates form immediately. The mixture is stirred for 1 h, filtered and the precipitate is washed several times with EtOH /  $\text{H}_2\text{O}$  dist., then dried in the oven.

All clathrates were analysed by ICP-OES to determine their respective Fe and Ni content. In addition, CHN analyses of all clathrates were carried out to determine their respective C, N, H content.

1a)  $\{\text{Fe}(\text{CH}_3\text{-pbpy}^+)_2[\text{Ni}(\text{CN})_4]_2 \cdot 2\text{H}_2\text{O}\}$  : Theory: Fe 6.1 %, Ni 12.9 %, C 55.3 %, H 3.8 %, N 18.4 %. Found: Fe 6.0 %, Ni 13.7 %, C 54.0%, H 3.0 %, N 18.0 %.

1b)  $\{\text{Fe}(\text{CH}_3\text{-pbpy}^+)_2[\text{Pt}(\text{CN})_4]_2 \cdot 2\text{H}_2\text{O}\}$  : Theory: Fe 4.7 %, Pt 32.9 %, C 42.6 %, H 2.9 %, N 14.2 %. Found: Fe 4.3 %, Pt 31.9 %, C 42.4 %, H 2.2 %, N 14.1 %.

2a)  $\{\text{Fe}(\text{Br-pbpy}^+)_2[\text{Ni}(\text{CN})_4]_2 \cdot 2\text{H}_2\text{O}\}$  : Theory: Fe 5.4 %, Ni 11.3 %, C 46.1 %, H 2.7 %, N 16.1 %. Found: Fe 5.3 %, Ni 12.1 %, C 44.8 %, H 3.0 %, N 15.8 %.

2b)  $\{\text{Fe}(\text{Br-pbpy}^+)_2[\text{Pt}(\text{CN})_4]_2 \cdot 2\text{H}_2\text{O}\}$  : Theory: Fe 4.3 %, Pt 29.7 %, C 36.6 %, H 2.2 %, N 12.8 %. Found: Fe 4.3 %, Pt 30.5 %, C 35.8 %, H 1.2 %, N 12.5 %.

3a)  $\{\text{Fe}(\text{COOCH}_3\text{-pbpy}^+)_2[\text{Ni}(\text{CN})_4]_2 \cdot 2\text{H}_2\text{O}\}$  : Theory: Fe 5.6 %, Ni 11.7 %, C 52.8 %, H 3.4 %, N 16.8 %. Found: Fe 5.3 %, Ni 13.0 %, C 49.7 %, H 2.7 %, N 16.6 %.

3b)  $\{\text{Fe}(\text{COOCH}_3\text{-pbpy}^+)_2[\text{Pt}(\text{CN})_4]_2 \cdot 2\text{H}_2\text{O}\}$  : Theory: Fe 4.4 %, Pt 30.6 %, C 41.5 %, H 2.7 %, N 13.2 %. Found: Fe 4.1 %, Pt 28.8 %, C 41.2 %, H 1.7 %, N 13.1 %.

4a)  $\{\text{Fe}(\text{NO}_2\text{-pbpy}^+)_2[\text{Ni}(\text{CN})_4]_2 \cdot 2\text{H}_2\text{O}\}$  : Theory: Fe 5.7 %, Ni 12.1 %, C 49.3 %, H 2.9 %, N 20.1 %. Found: Fe 6.0 %, Ni 14.5 %, C 47.1 %, H 2 %, N 19.9 %.

4b)  $\{\text{Fe}(\text{NO}_2\text{-pbpy}^+)_2[\text{Pt}(\text{CN})_4]_2 \cdot 2\text{H}_2\text{O}\}$  : Theory: Fe 4.5 %, Pt 31.3 %, C 38.5 %, H 2.3 %, N 15.7 %. Found: Fe 5.1 %, Pt 30.9 %, C 34.2 %, H 1.2 %, N 15.3 %.

The theoretical values are obtained from the crystal structures. Compounds 4a and 4b show the lowest crystallinity in pXRD measurements (see SI section 3.3), the defects of the structure could explain the higher than expected Ni content for those clathrates. Moreover, as the compounds are insoluble, the ICP analyses were done after mineralization in aqua regia, where, however, it is difficult to ensure complete dissolution. This could explain the slight inconsistencies observed.

## 1.3 Synthesis of clathrates $\{\text{Fe}(\text{L})_2[\mu_2\text{-Pt}(\text{CN})_4]_2 \cdot x\text{H}_2\text{O}\}$ as crystals (L= $\text{CH}_3\text{-pbpy}^+$ , $\text{COOCH}_3\text{-pbpy}^+$ or $\text{Br-pbpy}^+$ )

0.35 mmol of the respective ligand (L=  $\text{CH}_3\text{-pbpyCl}$ ,  $\text{COOCH}_3\text{-pbpyCl}$  or  $\text{Br-pbpyCl}$ ) are dissolved in 8 mL 50/50 v% EtOH /  $\text{H}_2\text{O}$  dist. and filled into an H-tube, then 0.1 mmol of  $\text{Fe}(\text{BF}_4)_2 \cdot 6 \text{H}_2\text{O}$  in 0.5 mL 50/50 v% EtOH /  $\text{H}_2\text{O}$  dist. are added on one side and 0.2 mmol of  $\text{K}_2[\text{Pt}(\text{CN})_4]$  in 0.5 mL 50/50 v% EtOH /  $\text{H}_2\text{O}$  dist. are added on the other side. After several days/weeks red crystals are formed and characterized via single crystal XRD.

## 2 Supplementary Figures

### 2.1 Electrochemical studies

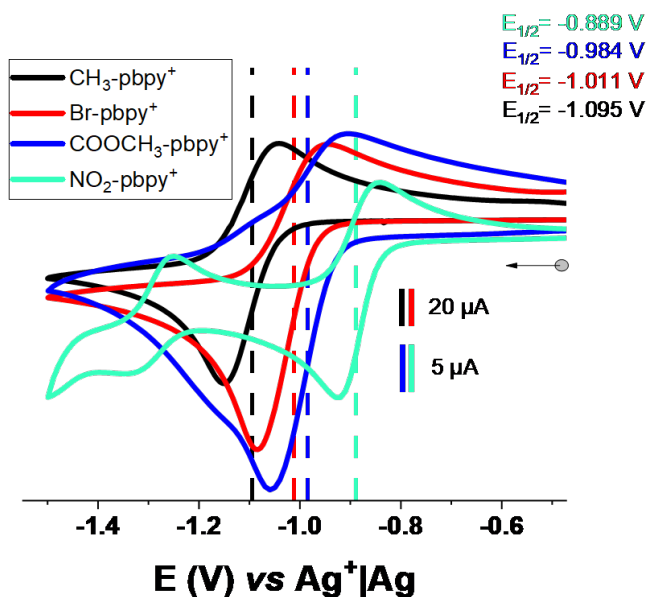

Supplementary Figure 6: Cyclic voltammetry of **CH<sub>3</sub>-pbpy<sup>+</sup>** (black), **Br-pbpy<sup>+</sup>** (red), **COOCH<sub>3</sub>-pbpy<sup>+</sup>** (blue) and **NO<sub>2</sub>-pbpy<sup>+</sup>** (green, the second wave is attributed to the reduction of the NO<sub>2</sub> moiety) showing the quasi-reversible reduction of the bipyridinium unit. [C]= 10<sup>-4</sup> M in 0.1M TBAP/CH<sub>3</sub>CN, reference: Ag<sup>+</sup>|Ag electrode ([Ag<sup>+</sup>]=10<sup>-2</sup> M in CH<sub>3</sub>CN); Scan rate: 100 mV·s<sup>-1</sup>).

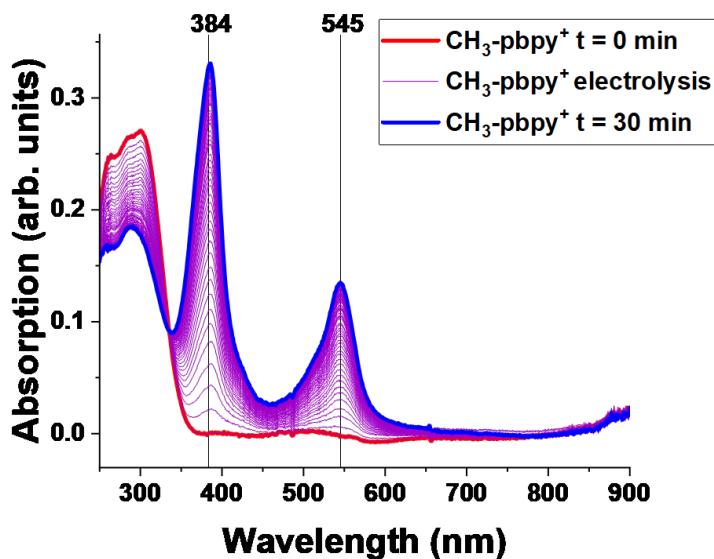

Supplementary Figure 7: Evolution of the UV-vis absorption spectra during the electrolysis of **CH<sub>3</sub>-pbpy<sup>+</sup>** at E<sub>app</sub>=-1.2 V (initial state, red line), spectra taken every 30 seconds ([C]=0.1 mM in 0.1 M TBAP/CH<sub>3</sub>CN, v: 100 mV·s<sup>-1</sup>, VC, Ø=3 mm, E (V) vs Ag<sup>+</sup>/Ag 10<sup>-2</sup> M in CH<sub>3</sub>CN).

## 2.2 Magnetic and optical behavior

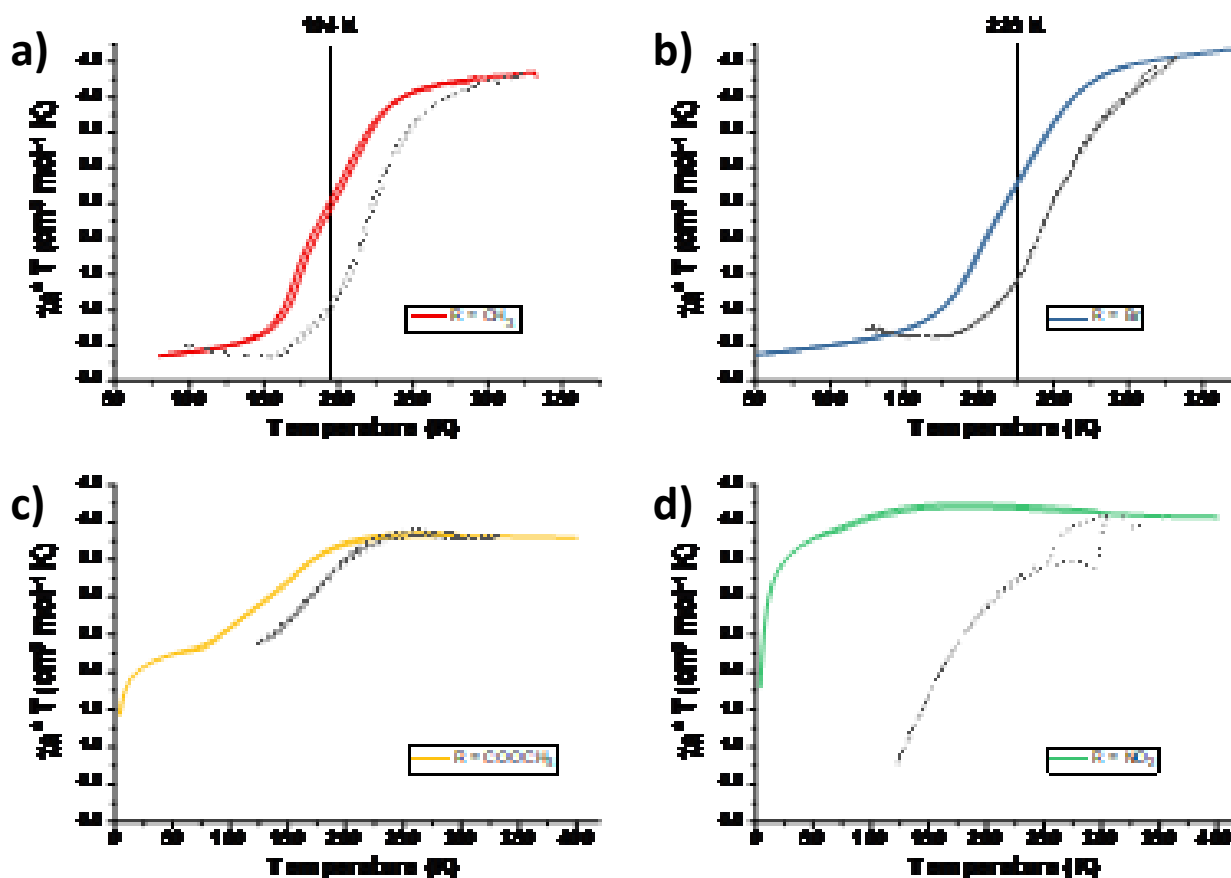

Supplementary Figure 8:  $\chi_a T$  vs T ( $\chi_a$  stands for the molar magnetic susceptibility) and variable temperature optical reflectivity for samples of **1-4b**  $\{\text{Fe}(\text{R-pbpy}^+)\}_2[\text{Pt}(\text{CN})_4]_2 \cdot 2\text{H}_2\text{O}$  (R= CH<sub>3</sub>, (curve a; red), Br (curve b; blue), COOCH<sub>3</sub> (curve c ;yellow) and NO<sub>2</sub> (curve d; green). The magnetic measurements are shown in the respective colors, the corresponding optical reflectivity curves in grey dots. While a slight shift of the SCO temperature can be seen, the materials general behavior is comparable to the respective Ni compounds shown in the manuscript.

## 2.3 PRDX

The powder X-ray diffraction (XRD) analyzes were carried out at room temperature on a Rigaku Miniflex600 benchtop powder diffractometer in a theta/2 theta geometry using a Cu anode (K-Alpha1 [Å] 1.54060), a fast 1D detector with energy selection, and a 6-position sample changer. Samples were measured in a range of 2theta from 5 to 60°, every 0.02°, with a speed of 5° per minute. Powder diffraction data obtained from samples of  $\{\text{Fe}(\mathbf{R}\text{-pbpy}^+)_2[\mu_2\text{-Ni}(\text{CN})_4]_2 \cdot 2\text{H}_2\text{O}\}$  is refined using unit cell parameters of the Pt analogue. As there is a large difference between these two metals there are small discrepancies regarding unit cell parameters, however, the fit is good enough to reason that both compounds show the same structural arrangement.

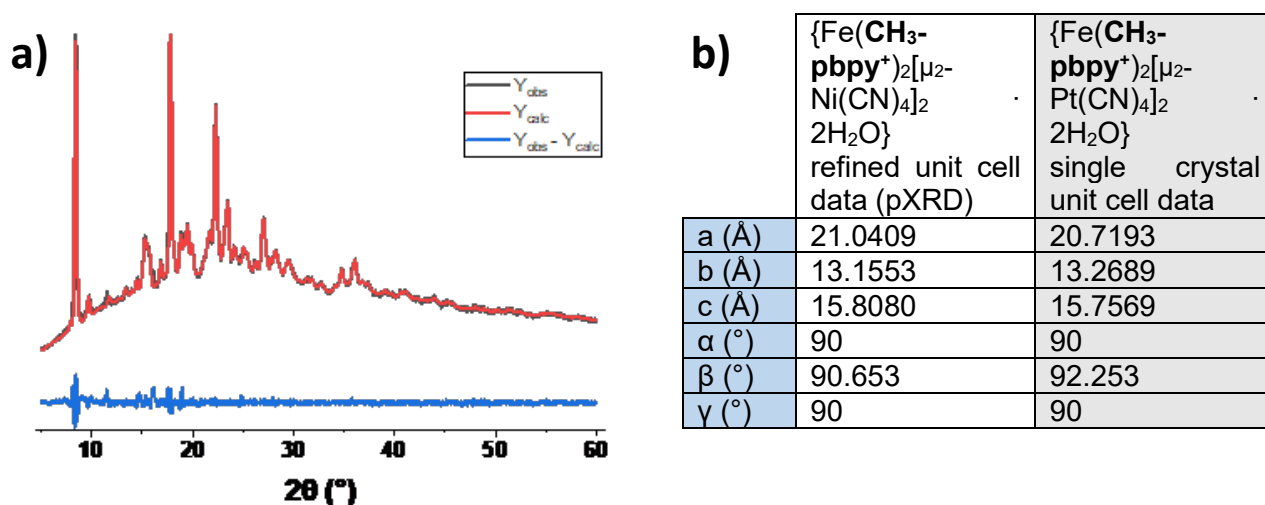

Supplementary Figure 9: a) pXRD diffractogram of  $\{\text{Fe}(\mathbf{CH}_3\text{-pbpy}^+)_2[\mu_2\text{-Ni}(\text{CN})_4]_2 \cdot 2\text{H}_2\text{O}\}$  (GOF= 1.71, Rp= 1.24, wRp= 2.10) and (b) obtained unit cell parameters via refinement using single crystal data of the Pt analogue.

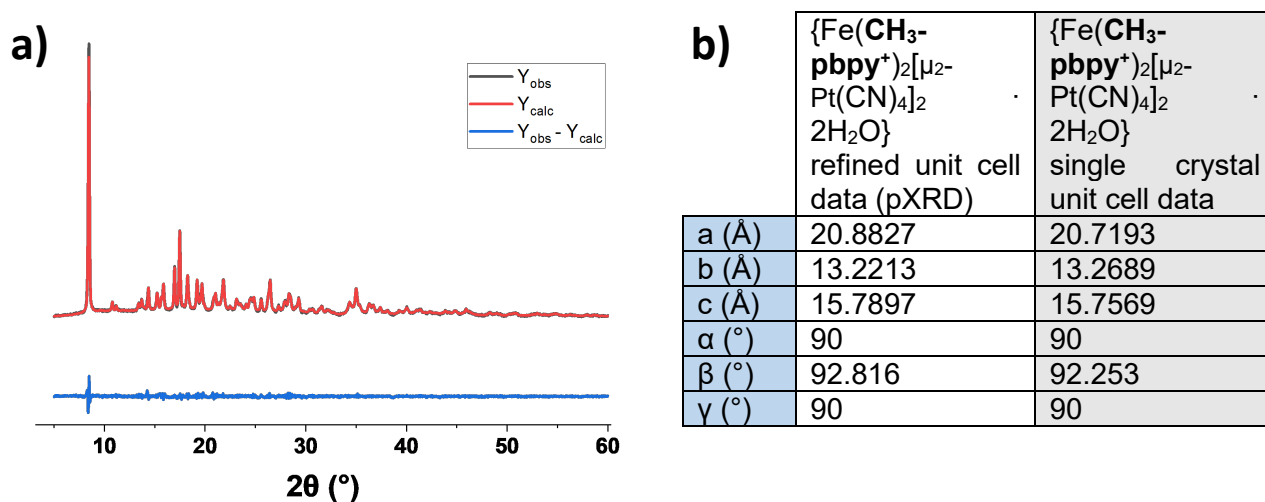

Supplementary Figure 10: a) pXRD diffractogram of  $\{\text{Fe}(\mathbf{CH}_3\text{-pbpy}^+)_2[\mu_2\text{-Pt}(\text{CN})_4]_2 \cdot 2\text{H}_2\text{O}\}$  (GOF= 0.99, Rp= 3.37, wRp= 4.44) and (b) obtained unit cell parameters via refinement using the corresponding single crystal data.

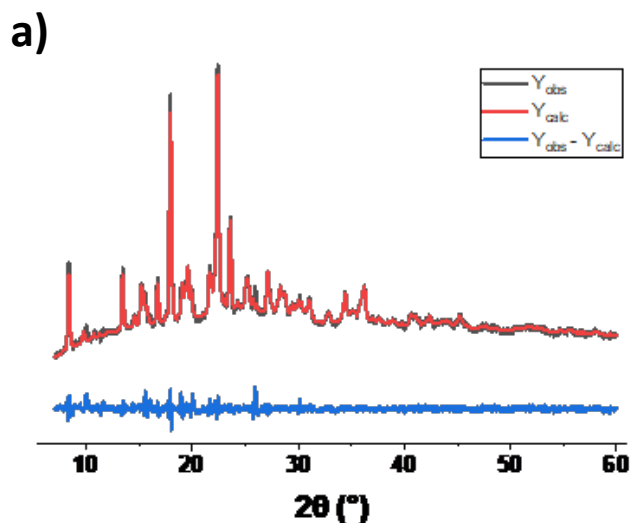

b)

|       | {Fe( <b>Br-pbpy</b> <sup>+</sup> ) <sub>2</sub> [μ <sub>2</sub> -Ni(CN) <sub>4</sub> ] <sub>2</sub> ·2H <sub>2</sub> O}<br>refined unit cell data (pXRD) | {Fe( <b>Br-pbpy</b> <sup>+</sup> ) <sub>2</sub> [μ <sub>2</sub> -Pt(CN) <sub>4</sub> ] <sub>2</sub> ·2H <sub>2</sub> O}<br>single crystal unit cell data |
|-------|----------------------------------------------------------------------------------------------------------------------------------------------------------|----------------------------------------------------------------------------------------------------------------------------------------------------------|
| a (Å) | 21.1976                                                                                                                                                  | 21.2590                                                                                                                                                  |
| b (Å) | 13.1744                                                                                                                                                  | 12.9694                                                                                                                                                  |
| c (Å) | 15.8027                                                                                                                                                  | 15.4095                                                                                                                                                  |
| α (°) | 90                                                                                                                                                       | 90                                                                                                                                                       |
| β (°) | 92.657                                                                                                                                                   | 92.8110                                                                                                                                                  |
| γ (°) | 90                                                                                                                                                       | 90                                                                                                                                                       |

Supplementary Figure 11: a) pXRD diffractogram of {Fe(**Br-pbpy**<sup>+</sup>)<sub>2</sub>[Ni(CN)<sub>4</sub>]<sub>2</sub>·2H<sub>2</sub>O} (GOF= 1.41, Rp= 1.92, wRp= 2.92) and (b) obtained unit cell parameters via refinement using single crystal data of the Pt analogue.

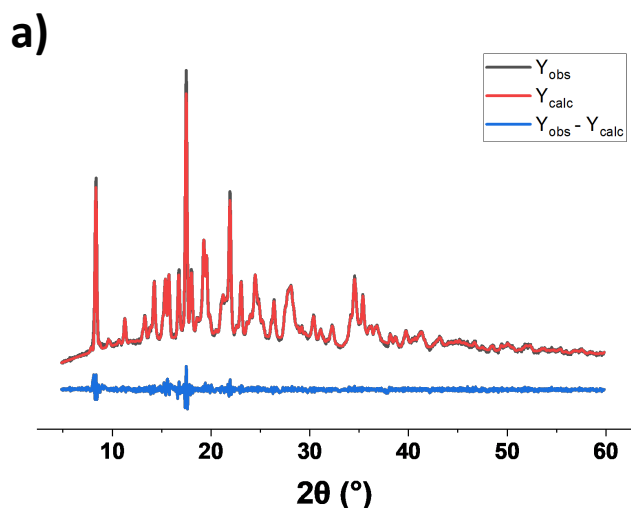

b)

|       | {Fe( <b>Br-pbpy</b> <sup>+</sup> ) <sub>2</sub> [μ <sub>2</sub> -Pt(CN) <sub>4</sub> ] <sub>2</sub> ·2H <sub>2</sub> O}<br>refined unit cell data (pXRD) | {Fe( <b>Br-pbpy</b> <sup>+</sup> ) <sub>2</sub> [μ <sub>2</sub> -Pt(CN) <sub>4</sub> ] <sub>2</sub> ·2H <sub>2</sub> O}<br>single crystal unit cell data |
|-------|----------------------------------------------------------------------------------------------------------------------------------------------------------|----------------------------------------------------------------------------------------------------------------------------------------------------------|
| a (Å) | 21.2083                                                                                                                                                  | 21.2590                                                                                                                                                  |
| b (Å) | 13.2861                                                                                                                                                  | 12.9694                                                                                                                                                  |
| c (Å) | 15.6911                                                                                                                                                  | 15.4095                                                                                                                                                  |
| α (°) | 90                                                                                                                                                       | 90                                                                                                                                                       |
| β (°) | 91.823                                                                                                                                                   | 92.8110                                                                                                                                                  |
| γ (°) | 90                                                                                                                                                       | 90                                                                                                                                                       |

Supplementary Figure 12: a) pXRD diffractogram of {Fe(**Br-pbpy**<sup>+</sup>)<sub>2</sub>[μ<sub>2</sub>-Pt(CN)<sub>4</sub>]<sub>2</sub>·2H<sub>2</sub>O} (GOF= 1.12, Rp= 2.10, wRp= 3.02) and (b) obtained unit cell parameters via refinement using corresponding single crystal data.



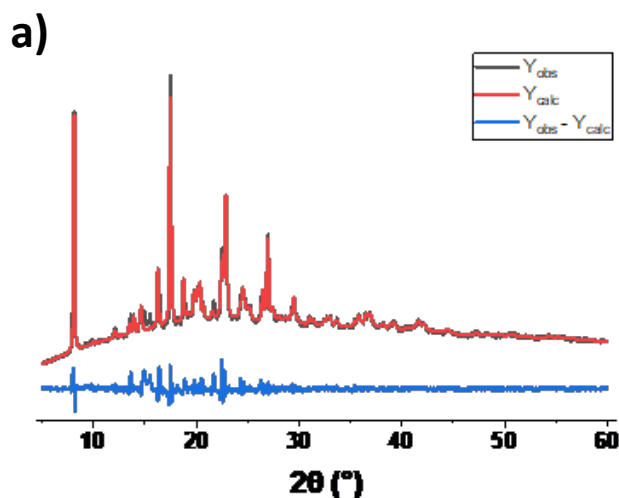

b)

|       | {Fe(COOCH <sub>3</sub> -pbpy <sup>+</sup> ) <sub>2</sub> [μ <sub>2</sub> -Ni(CN) <sub>4</sub> ] <sub>2</sub> ·2H <sub>2</sub> O}<br>refined unit cell data (pXRD) | {Fe(COOCH <sub>3</sub> -pbpy <sup>+</sup> ) <sub>2</sub> [μ <sub>2</sub> -Pt(CN) <sub>4</sub> ] <sub>2</sub> ·2H <sub>2</sub> O}<br>single crystal unit cell data |
|-------|-------------------------------------------------------------------------------------------------------------------------------------------------------------------|-------------------------------------------------------------------------------------------------------------------------------------------------------------------|
| a (Å) | 12.0809                                                                                                                                                           | 12.0484                                                                                                                                                           |
| b (Å) | 14.5458                                                                                                                                                           | 14.6058                                                                                                                                                           |
| c (Å) | 14.5214                                                                                                                                                           | 14.0583                                                                                                                                                           |
| α (°) | 90                                                                                                                                                                | 90                                                                                                                                                                |
| β (°) | 112.116                                                                                                                                                           | 111.665                                                                                                                                                           |
| γ (°) | 90                                                                                                                                                                | 90                                                                                                                                                                |

Supplementary Figure 13: a) pXRD diffractogram of {Fe(COOCH<sub>3</sub>-pbpy<sup>+</sup>)<sub>2</sub>[μ<sub>2</sub>-Ni(CN)<sub>4</sub>]<sub>2</sub>·xH<sub>2</sub>O} (GOF= 2.15, Rp= 2.16, wRp= 3.51) and (b) obtained unit cell parameters via refinement using single crystal data of the Pt analogue.

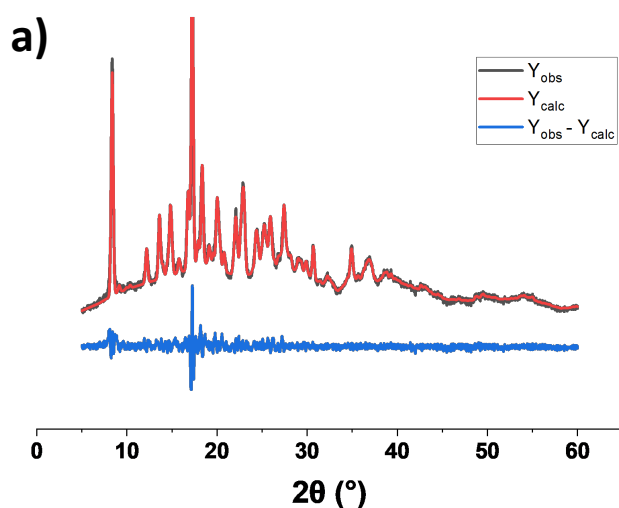

b)

|       | {Fe(COOCH <sub>3</sub> -pbpy <sup>+</sup> ) <sub>2</sub> [μ <sub>2</sub> -Pt(CN) <sub>4</sub> ] <sub>2</sub> ·2H <sub>2</sub> O}<br>refined unit cell data (pXRD) | {Fe(COOCH <sub>3</sub> -pbpy <sup>+</sup> ) <sub>2</sub> [μ <sub>2</sub> -Pt(CN) <sub>4</sub> ] <sub>2</sub> ·2H <sub>2</sub> O}<br>single crystal unit cell data |
|-------|-------------------------------------------------------------------------------------------------------------------------------------------------------------------|-------------------------------------------------------------------------------------------------------------------------------------------------------------------|
| a (Å) | 12.0317                                                                                                                                                           | 12.0484                                                                                                                                                           |
| b (Å) | 14.4969                                                                                                                                                           | 14.6058                                                                                                                                                           |
| c (Å) | 13.8660                                                                                                                                                           | 14.0583                                                                                                                                                           |
| α (°) | 90                                                                                                                                                                | 90                                                                                                                                                                |
| β (°) | 111.059                                                                                                                                                           | 111.665                                                                                                                                                           |
| γ (°) | 90                                                                                                                                                                | 90                                                                                                                                                                |

Supplementary Figure 14: a) pXRD diffractogram of {Fe(COOCH<sub>3</sub>-pbpy<sup>+</sup>)<sub>2</sub>[μ<sub>2</sub>-Pt(CN)<sub>4</sub>]<sub>2</sub>·xH<sub>2</sub>O} (GOF= 1.37, Rp= 2.69, wRp= 3.89) and (b) obtained unit cell parameters via refinement using the corresponding single crystal data.

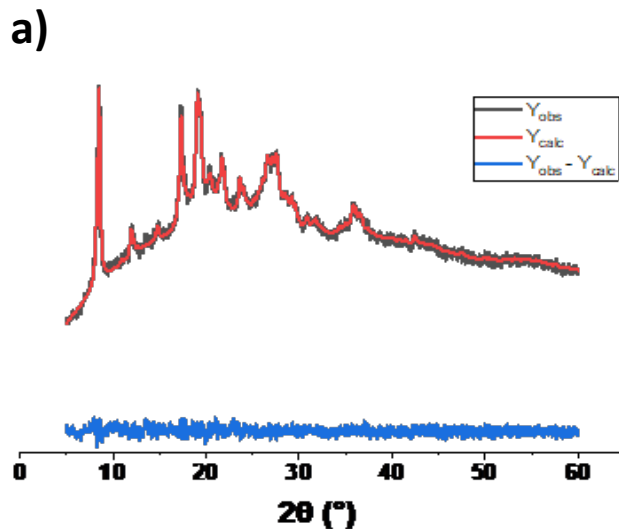

b)

|       | {Fe(NO <sub>2</sub> - <b>pbpy</b> <sup>+</sup> ) <sub>2</sub> [μ <sub>2</sub> -Ni(CN) <sub>4</sub> ] <sub>2</sub> · 2H <sub>2</sub> O} refined unit cell data (pXRD) | {Fe(NO <sub>2</sub> - <b>pbpy</b> <sup>+</sup> ) <sub>2</sub> [μ <sub>2</sub> -Pd(CN) <sub>4</sub> ] <sub>2</sub> · 2H <sub>2</sub> O} single crystal unit cell data |
|-------|----------------------------------------------------------------------------------------------------------------------------------------------------------------------|----------------------------------------------------------------------------------------------------------------------------------------------------------------------|
| a (Å) | 10.4004                                                                                                                                                              | 10.4468                                                                                                                                                              |
| b (Å) | 10.5467                                                                                                                                                              | 10.5411                                                                                                                                                              |
| c (Å) | 11.0064                                                                                                                                                              | 10.7900                                                                                                                                                              |
| α (°) | 81.229                                                                                                                                                               | 82.13                                                                                                                                                                |
| β (°) | 80.546                                                                                                                                                               | 81.252                                                                                                                                                               |
| γ (°) | 87.274                                                                                                                                                               | 86.422                                                                                                                                                               |

Supplementary Figure 15: a) pXRD diffractogram of {Fe(NO<sub>2</sub>-**pbpy**<sup>+</sup>)<sub>2</sub>[μ<sub>2</sub>-Ni(CN)<sub>4</sub>]<sub>2</sub>} (GOF= 0.89, Rp= 1.53, wRp= 1.98) and (b) obtained unit cell parameters via refinement using single crystal data of the Pd analogue.

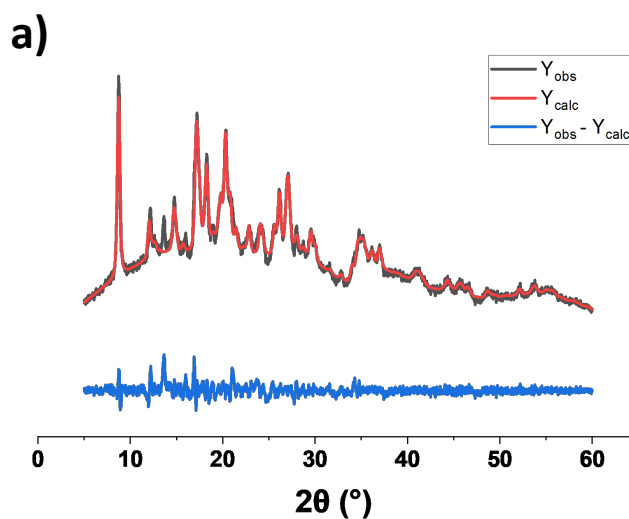

b)

|       | {Fe(NO <sub>2</sub> - <b>pbpy</b> <sup>+</sup> ) <sub>2</sub> [μ <sub>2</sub> -Pt(CN) <sub>4</sub> ] <sub>2</sub> · 2H <sub>2</sub> O} refined unit cell data (pXRD) | {Fe(NO <sub>2</sub> - <b>pbpy</b> <sup>+</sup> ) <sub>2</sub> [μ <sub>2</sub> -Pd(CN) <sub>4</sub> ] <sub>2</sub> · 2H <sub>2</sub> O} single crystal unit cell data |
|-------|----------------------------------------------------------------------------------------------------------------------------------------------------------------------|----------------------------------------------------------------------------------------------------------------------------------------------------------------------|
| a (Å) | 10.2337                                                                                                                                                              | 10.4468                                                                                                                                                              |
| b (Å) | 10.4269                                                                                                                                                              | 10.5411                                                                                                                                                              |
| c (Å) | 11.0970                                                                                                                                                              | 10.7900                                                                                                                                                              |
| α (°) | 83.018                                                                                                                                                               | 82.13                                                                                                                                                                |
| β (°) | 81.693                                                                                                                                                               | 81.252                                                                                                                                                               |
| γ (°) | 87.384                                                                                                                                                               | 86.422                                                                                                                                                               |

Supplementary Figure 16: a) pXRD diffractogram of {Fe(NO<sub>2</sub>-**pbpy**<sup>+</sup>)<sub>2</sub>[μ<sub>2</sub>-Pt(CN)<sub>4</sub>]<sub>2</sub> · 2H<sub>2</sub>O} (GOF= 1.36, Rp= 2.97, wRp= 4.09) and (b) obtained unit cell parameters via refinement using single crystal data of the Pd analogue.

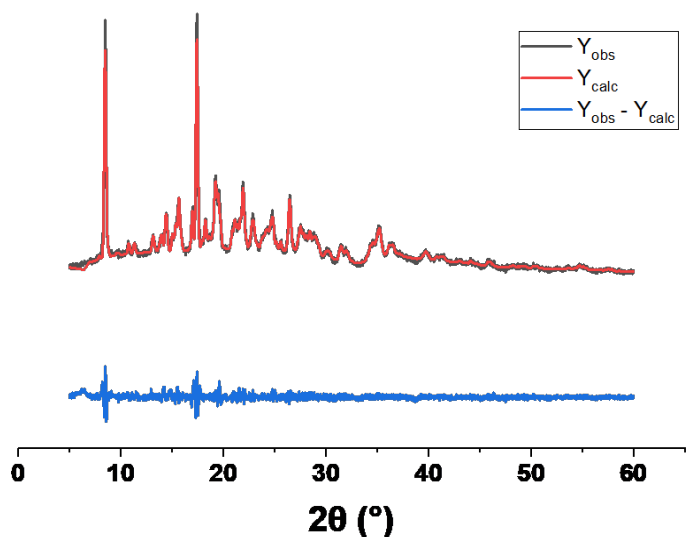

Supplementary Figure 17: pXRD diffractogram of **1b-Zn**  $\{Zn(CH_3\text{-pbpy}^+)_2[\mu_2\text{-Pt(CN)}_4]_2 \cdot 2H_2O\}$  (GOF= 1.13, Rp = 3.94, wRp = 5.49). The calculated diffraction pattern was refined using unit cell parameters of  $[Fe(CH_3\text{-pbpy})_2[Pt(CN)_4]_2 \cdot 2H_2O]$ . Obtained unit cell parameters: a= 20.9253, b= 13.2819, c= 15.6712,  $\alpha$ = 90.000,  $\beta$ = 92.562,  $\gamma$ = 90.000.

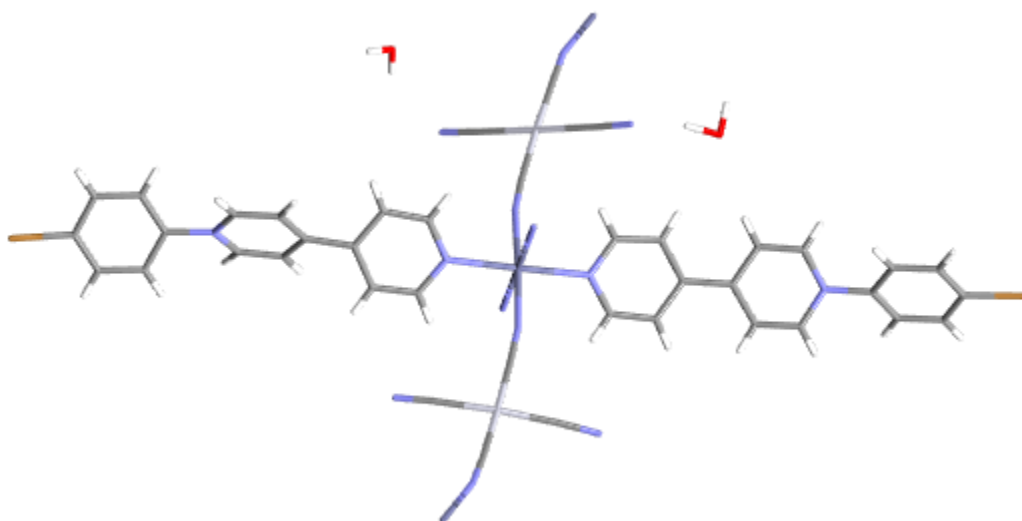

Supplementary Figure 18: Unit cell of **2b-Zn**  $\{Zn(Br\text{-pbpy}^+)_2[\mu_2\text{-Pt(CN)}_4]_2 \cdot 2H_2O\}$ , it is isostructural to the respective  $Fe^{II}$  compound (see also Supplementary Table 11).

## 2.4 Electronic spectroscopy

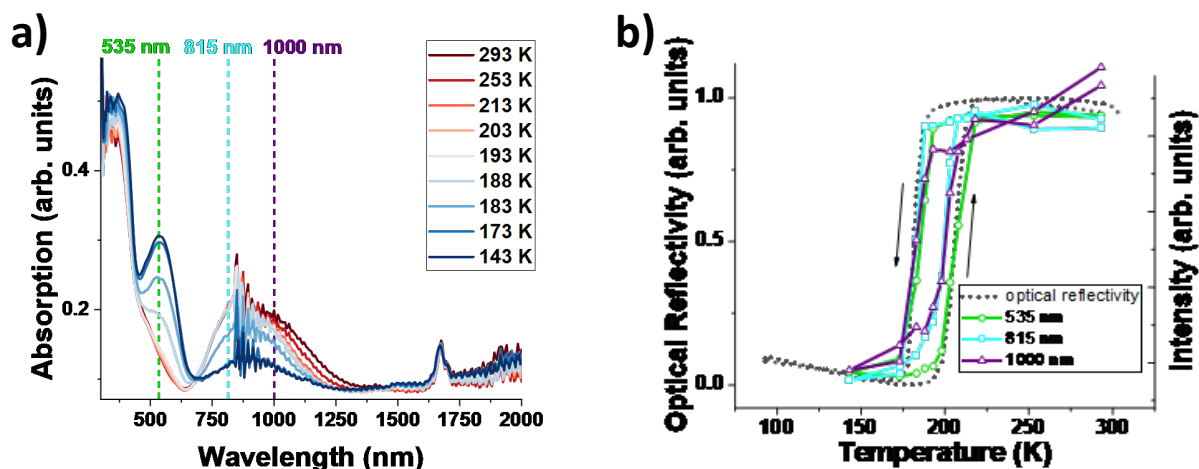

Supplementary Figure 19: a) Evolution of UV-vis-NIR absorption spectra of  $\{\text{Fe}(\text{py})_2[\mu_4\text{-Ni}(\text{CN})_4]\cdot 2\text{H}_2\text{O}\}$  upon heating from 103 K, b) evolution of the absorption band intensities with temperature. The absorption band intensity scale for 535 nm (green) has been inverted to facilitate a comparison with the other absorption bands. Arrows indicate heating and cooling.

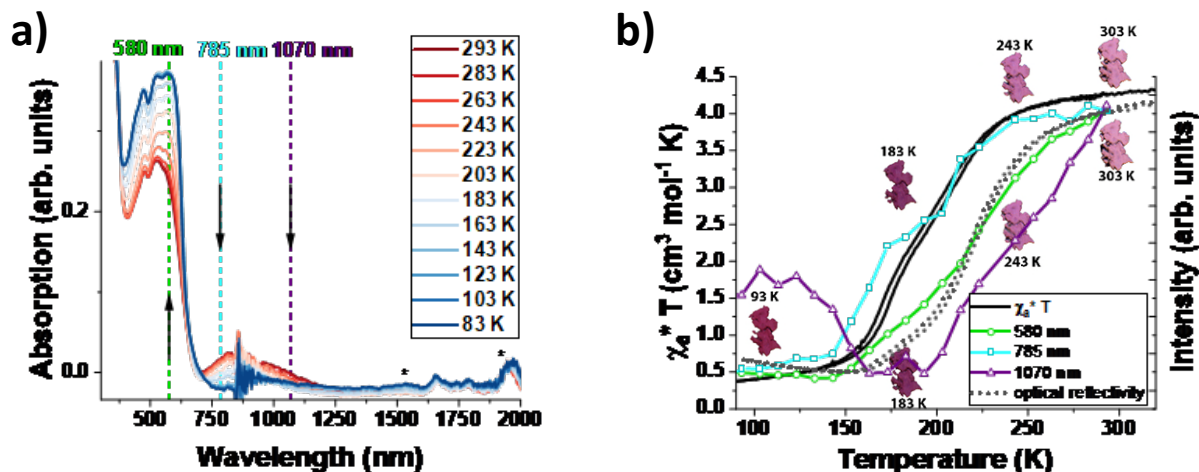

Supplementary Figure 20: a) Temperature dependent UV-vis-NIR absorption spectra of **1b**  $\text{Fe}(\text{CH}_3\text{-pbpy}^+)_2[\mu_2\text{-Ni}(\text{CN})_4]_2\cdot 2\text{H}_2\text{O}$  upon cooling and b) comparison of the evolution of  $\chi_a T$  of **1b** and the absorption intensities at selected wavelengths as a function of the temperature. The absorption intensity scale for 580 nm (green) has been inverted to facilitate a comparison with the optical behavior. The peaks marked with \* stem from water/humidity.

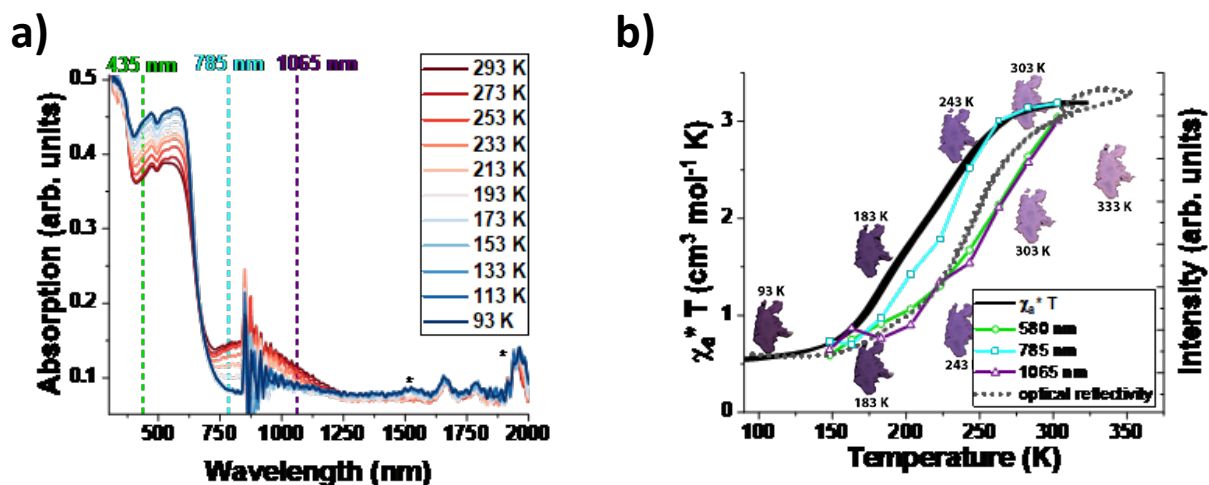

Supplementary Figure 21: a) Evolution of UV-vis-NIR absorption spectra of **2a** {Fe(Br-pbpy)<sup>+</sup><sub>2</sub>[μ<sub>2</sub>-Ni(CN)<sub>4</sub>]<sub>2</sub>·2H<sub>2</sub>O} upon cooling, and b) comparison of the evolution of  $\chi_a T$  of **2a** and the absorption intensities at selected wavelengths as a function of the temperature. The absorption intensity scale for 585 nm (green) has been inverted to facilitate a comparison with the optical behavior. The peaks marked with \* stem from water/humidity.

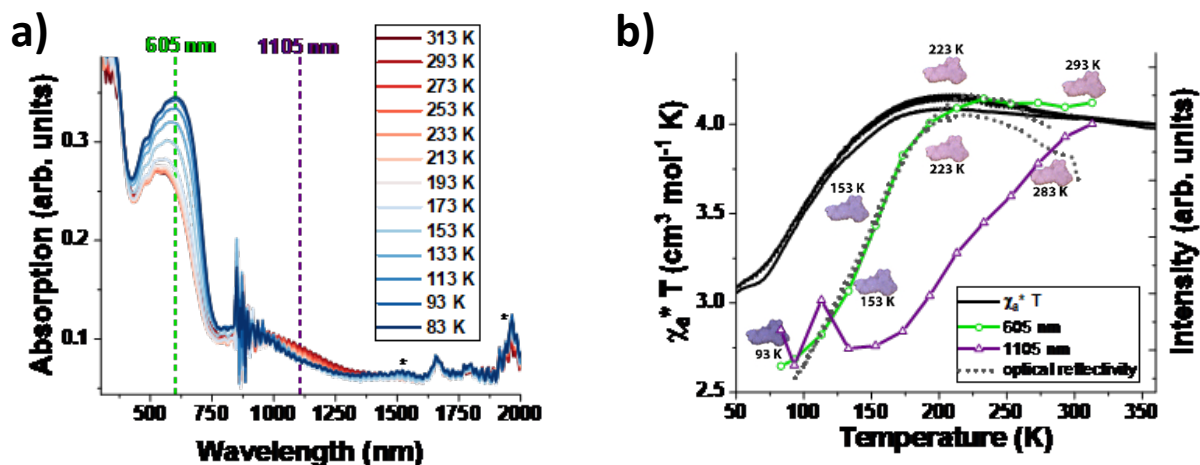

Supplementary Figure 22: a) Evolution of UV-vis-NIR absorption spectrum of **3a** {Fe(CH<sub>3</sub>OOC-pbpy)<sup>+</sup><sub>2</sub>[μ<sub>2</sub>-Ni(CN)<sub>4</sub>]<sub>2</sub>·2H<sub>2</sub>O} upon cooling, b) comparison of the evolution of  $\chi_a T$  of **3a** and the absorption intensities at selected wavelengths as a function of the temperature. The absorption intensity scale for 605 nm (green) has been inverted to facilitate a comparison with the optical behavior. The peaks marked with \* stem from water/humidity.

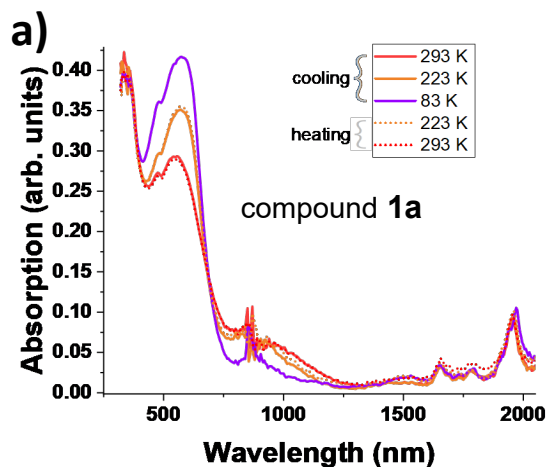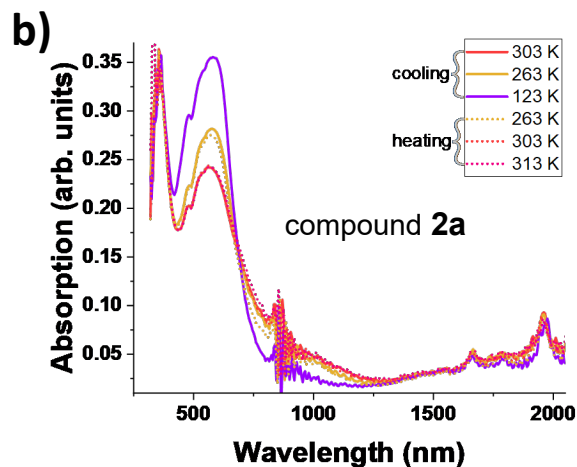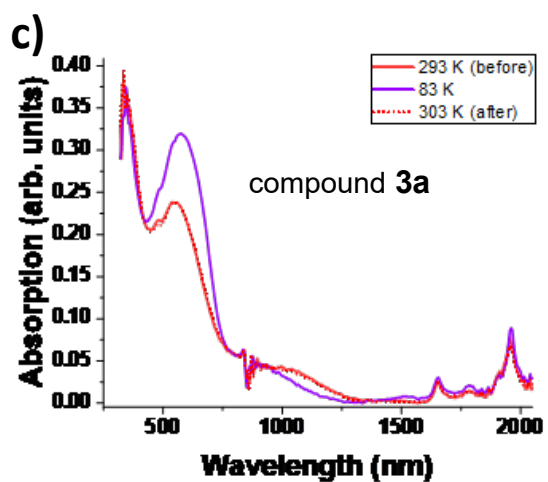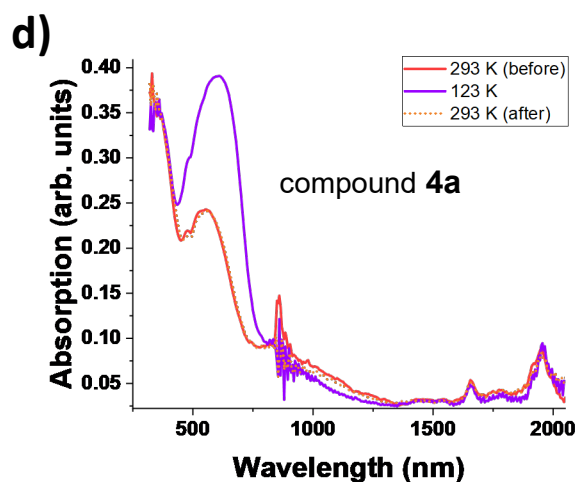

Supplementary Figure 23: Comparison of UV-Vis-NIR absorption spectra before and after cooling, showing that the observed thermochromism is fully reversible for all samples. a) Compound **1a**, b) compound **2a**, c) compound **3a** and d) compound **4a**.

## 2.5 Mössbauer spectroscopy

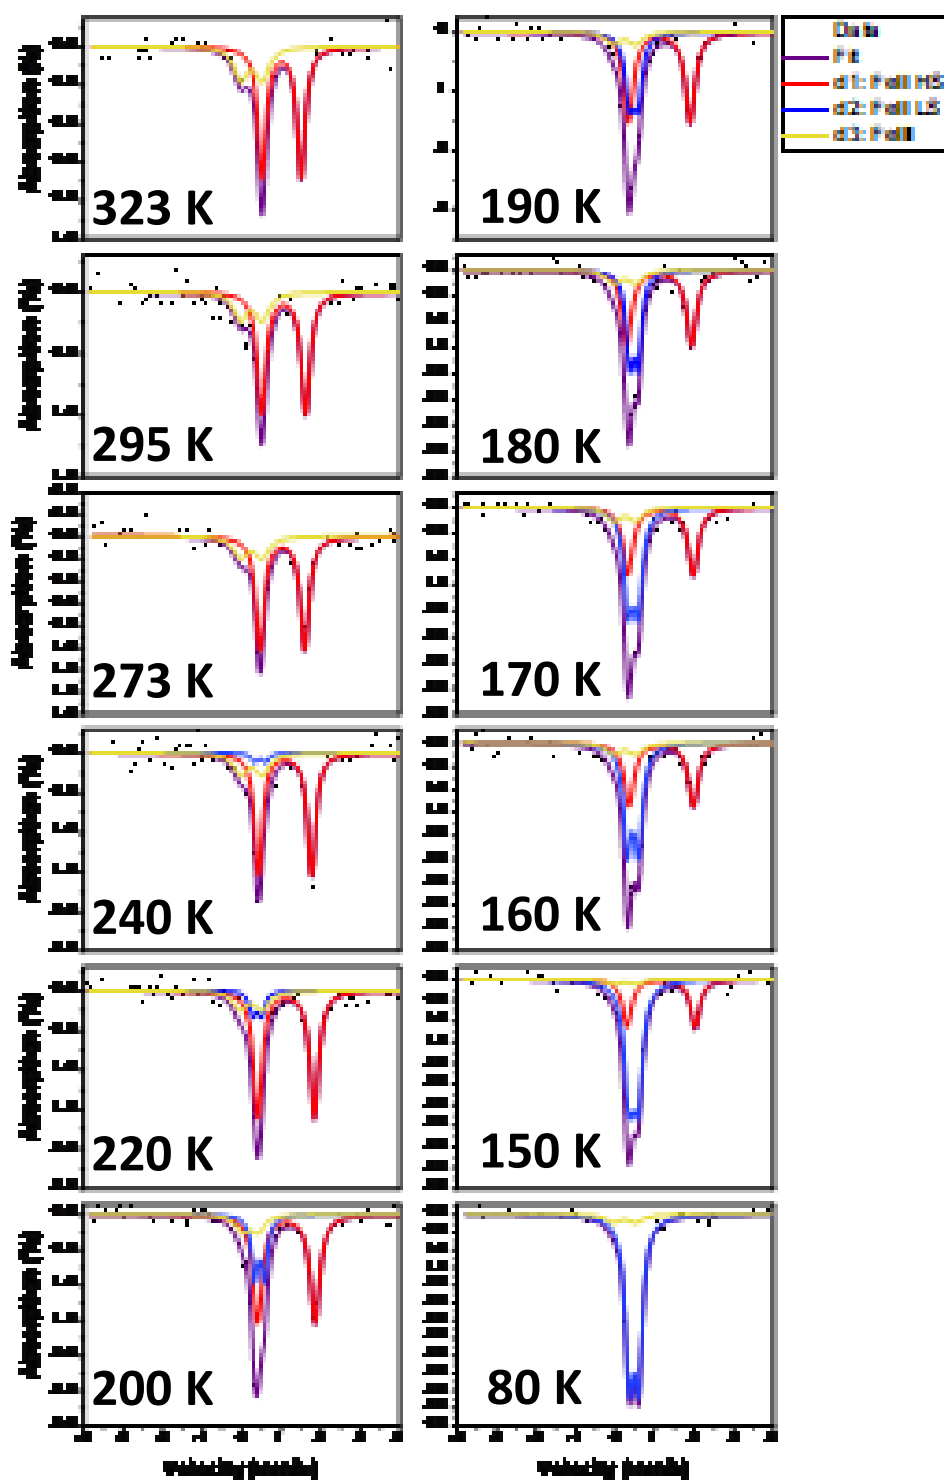

Supplementary Figure 24:  $^{57}\text{Fe}$  Mössbauer spectra of  $\{\text{Fe}(\text{CH}_3\text{-pbpy}^+)\}_2[\mu_2\text{-Ni}(\text{CN})_4]_2 \cdot 2\text{H}_2\text{O}$  at various temperatures.

Supplementary Table 1: Mössbauer parameters of doublets found in  $\{\text{Fe}(\text{CH}_3\text{-pbpy}^+)\}_2[\mu_2\text{-Ni}(\text{CN})_4]_2 \cdot 2\text{H}_2\text{O}\}$ , see Supplementary Figure 24; parameters without error values were fixed for the fitting procedure.

| Temperature (K) | CS (mm/s)           | QS (mm/s)           | width (mm/s)        | Population (%)      |
|-----------------|---------------------|---------------------|---------------------|---------------------|
|                 | Fe <sup>II</sup> HS | Fe <sup>II</sup> HS | Fe <sup>II</sup> HS | Fe <sup>II</sup> HS |
| 80              | - -                 | - -                 | - -                 | 0 -                 |
| 150             | 1.161 ± 0.030       | 1.723 ± 0.059       | 0.138 ± 0.030       | 28.8 ± 4.8          |
| 160             | 1.162 ± 0.032       | 1.626 ± 0.065       | 0.147 ± 0.035       | 39.1 ± 7.3          |
| 170             | 1.145 ± 0.098       | 1.65 ± 0.19         | 0.150 ± 0.025       | 40.6 ± 5.6          |
| 180             | 1.109 ± 0.018       | 1.637 ± 0.036       | 0.149 ± 0.025       | 49.0 ± 6.3          |
| 190             | 1.116 ± 0.044       | 1.560 ± 0.088       | 0.150 ± 0.019       | 55.9 ± 5.5          |
| 200             | 1.124 ± 0.053       | 1.45 ± 0.11         | 0.143 ± 0.020       | 63.0 ± 7.0          |
| 220             | 1.116 ± 0.0086      | 1.432 ± 0.017       | 0.132 ± 0.016       | 72.6 ± 6.6          |
| 273             | 1.0278 ± 0.0084     | 1.132 ± 0.017       | 0.130 ± 0.013       | 77.5 ± 6.5          |
| 295             | 1.056 ± 0.013       | 1.113 ± 0.026       | 0.134 ± 0.019       | 74.4 ± 9.1          |
| 323             | 1.005 ± 0.017       | 0.987 ± 0.035       | 0.127 ± 0.016       | 71.3 ± 6.9          |
|                 | Fe <sup>II</sup> LS | Fe <sup>II</sup> LS | Fe <sup>II</sup> LS | Fe <sup>II</sup> LS |
| 80              | 0.4674 ± 0.0040     | 0.2353 ± 0.0064     | 0.1225 ± 0.0067     | 92.3 ± 4.0          |
| 150             | 0.461 ± 0.014       | 0.231 ± 0.024       | 0.141 ± 0.016       | 66.9 ± 5.7          |
| 160             | 0.445 ± 0.018       | 0.277 ± 0.039       | 0.122 ± 0.020       | 51.7 ± 7.7          |
| 170             | 0.451 ± 0.067       | 0.25 ± 0.13         | 0.132 ± 0.018       | 48.9 -              |
| 180             | 0.466 ± 0.015       | 0.210 ± 0.023       | 0.108 ± 0.017       | 39.6 -              |
| 190             | 0.460 ± 0.057       | 0.21 ± 0.10         | 0.127 ± 0.024       | 34.2 -              |
| 200             | 0.440 ± 0.027       | 0.255 ± 0.042       | 0.098 ± 0.031       | 24.2 ± 4.7          |
| 220             | 0.386 ± 0.048       | 0.222 ± 0.096       | 0.103 ± 0.051       | 10.4 -              |
| 273             | - -                 | - -                 | - -                 | 0 -                 |
| 295             | - -                 | - -                 | - -                 | 0 -                 |
| 323             | - -                 | - -                 | - -                 | 0 -                 |
|                 | Fe <sup>III</sup>   | Fe <sup>III</sup>   | Fe <sup>III</sup>   | Fe <sup>III</sup>   |
| 80              | 0.24 -              | 0.56 -              | 0.21 -              | 7.7 ± 4.4           |
| 150             | 0.24 -              | 0.56 -              | 0.21 -              | 4.3 ± 5.5           |
| 160             | 0.24 -              | 0.56 -              | 0.21 -              | 9.3 ± 7.8           |
| 170             | 0.24 -              | 0.56 -              | 0.21 -              | 10.5 ± 4.1          |
| 180             | 0.24 -              | 0.56 -              | 0.21 -              | 11.3 ± 4.4          |
| 190             | 0.24 -              | 0.56 -              | 0.21 -              | 10 ± 4              |
| 200             | 0.24 -              | 0.56 -              | 0.21 -              | 12.8 -              |
| 220             | 0.24 -              | 0.56 -              | 0.21 -              | 17.0 ± 4.7          |
| 273             | 0.24 -              | 0.56 -              | 0.21 -              | 22.5 ± 5.2          |
| 295             | 0.24 -              | 0.56 -              | 0.21 -              | 25.6 ± 7.2          |
| 323             | 0.241 ± 0.100       | 0.55 ± 0.17         | 0.206 ± 0.080       | 28.7 ± 7.5          |



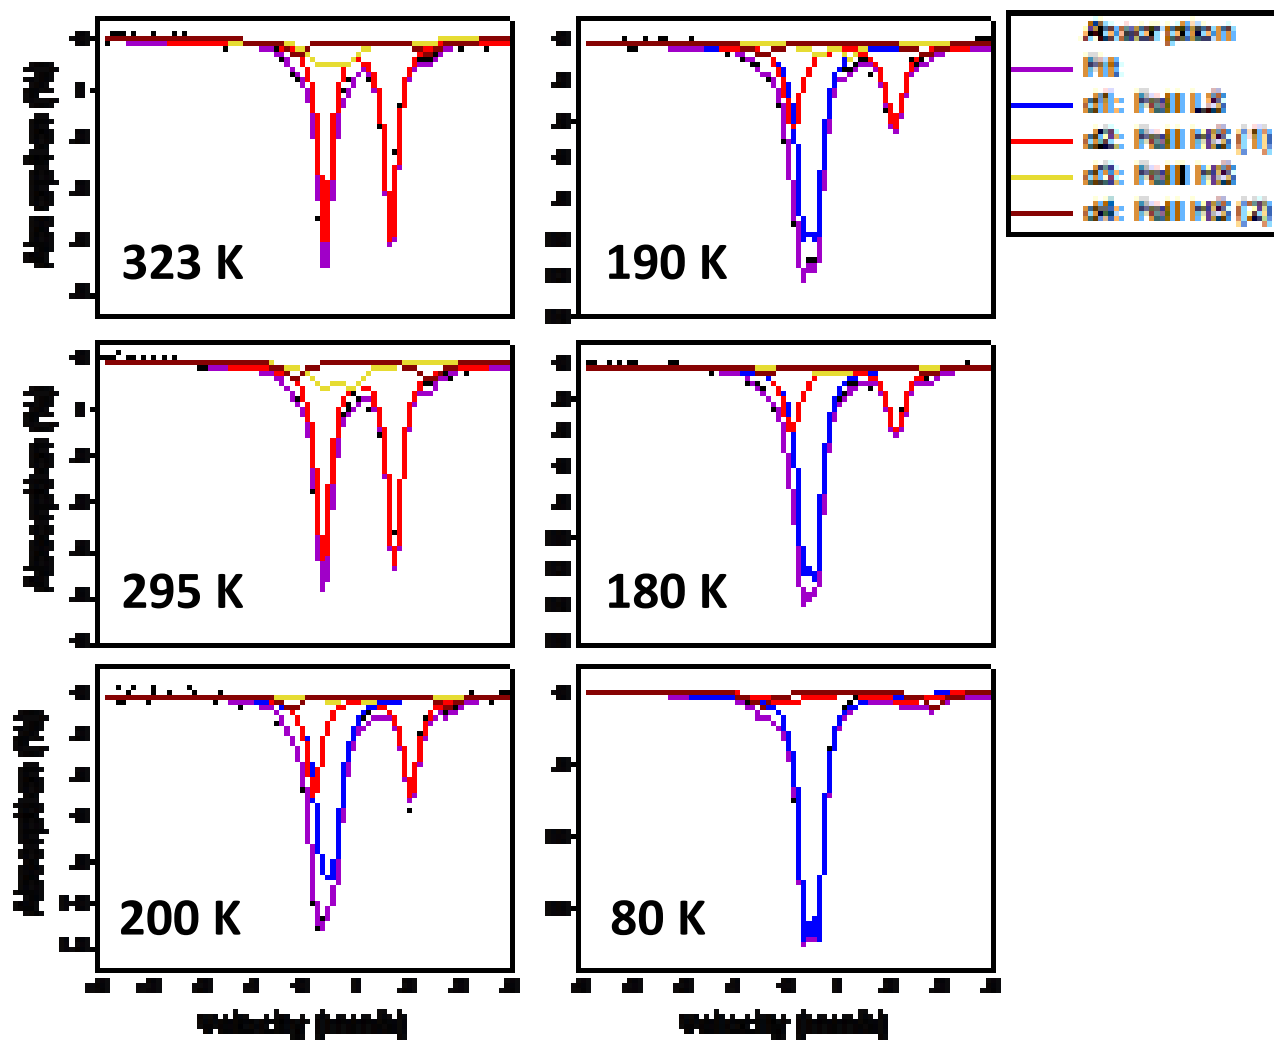

Supplementary Figure 25:  $^{57}\text{Fe}$  Mössbauer spectra of  $\{\text{Fe}(\text{Br-pbpy}^+)_2[\mu_2\text{-Ni}(\text{CN})_4]_2 \cdot 2\text{H}_2\text{O}\}$  at a selected temperatures. The sample is  $^{57}\text{Fe}$  enriched.

Supplementary Table 2: Mössbauer parameters of doublets found in  $\{^{57}\text{Fe}(\text{Br-pbpy}^+)_2[\mu_2\text{-Ni}(\text{CN})_4]_2 \cdot 2\text{H}_2\text{O}\}$ , see Supplementary Figure 25.

| Temperature (K) | CS (mm/s)               | QS (mm/s)               | width (mm/s)            | Population (%)          |
|-----------------|-------------------------|-------------------------|-------------------------|-------------------------|
|                 | Fe <sup>II</sup> HS (1) |
| 80              | 1.156 ± 0.041           | 2.38 ± 0.13             | 0.322 ± 0.093           | 9.8 ± 3.5               |
| 180             | 1.1148 ± 0.0079         | 2.017 ± 0.016           | 0.197 ± 0.012           | 31.4 ± 1.7              |
| 190             | 1.1079 ± 0.0092         | 1.959 ± 0.018           | 0.194 ± 0.015           | 36.6 ± 2.5              |
| 200             | 1.118 ± 0.010           | 1.877 ± 0.020           | 0.175 ± 0.015           | 39.3 ± 2.8              |
| 295             | 1.0484 ± 0.0061         | 1.372 ± 0.012           | 0.1664 ± 0.0045         | 79.7 ± 2.0              |
| 323             | 1.0322 ± 0.0028         | 1.2699 ± 0.0055         | 0.1451 ± 0.0043         | 77.2 ± 2.0              |
|                 | Fe <sup>II</sup> LS     | Fe <sup>II</sup> LS     | Fe <sup>II</sup> LS     | Fe <sup>II</sup> LS     |
| 80              | 0.4820 ± 0.0015         | 0.2434 ± 0.0022         | 0.1441 ± 0.0021         | 82.43 ± 0.85            |
| 180             | 0.4536 ± 0.0050         | 0.2338 ± 0.0073         | 0.1558 ± 0.0070         | 60.7 ± 1.4              |
| 190             | 0.45 ± 0.20             | 0.24 ± 0.39             | 0.1578 ± 0.0082         | 54.0 ± 1.8              |
| 200             | 0.451 ± 0.056           | 0.23 ± 0.13             | 0.183 ± 0.022           | 52.4 ± 2.7              |
| 295             | - -                     | - -                     | - -                     | 0 -                     |
| 323             | - -                     | - -                     | - -                     | 0 -                     |
|                 | Fe <sup>III</sup>       | Fe <sup>III</sup>       | Fe <sup>III</sup>       | Fe <sup>III</sup>       |
| 80              | - -                     | - -                     | - -                     | - -                     |
| 180             | 0.880 ± 0.087           | 0.51 ± 0.17             | 0.16 -                  | 3.3 ± 1.1               |
| 190             | 0.9 ± 2.5               | 0.6 ± 5.0               | 0.16 -                  | 4.3 ± 1.6               |
| 200             | 0.9 ± 1.0               | 0.7 ± 2.1               | 0.16 -                  | 2.4 ± 1.9               |
| 295             | 0.633 ± 0.079           | 0.57 ± 0.14             | 0.25 -                  | 12.7 ± 1.5              |
| 323             | 0.541 ± 0.040           | 0.495 ± 0.074           | 0.25 -                  | 14.7 ± 1.6              |
|                 | Fe <sup>II</sup> HS (2) |
| 80              | 1.181 ± 0.021           | 3.323 ± 0.058           | 0.197 ± 0.050           | 7.7 ± 2.6               |
| 180             | 1.164 ± 0.045           | 3.196 ± 0.095           | 0.2 -                   | 4.6 ± 1.0               |
| 190             | 1.111 ± 0.059           | 3.14 ± 0.12             | 0.2 -                   | 5.1 ± 1.4               |
| 200             | 1.241 ± 0.093           | 3.01 ± 0.20             | 0.2 -                   | 8.1 ± 2.4               |
| 295             | 1.125 ± 0.039           | 2.615 ± 0.080           | 0.2 -                   | 7.5 ± 1.3               |
| 323             | 1.104 ± 0.039           | 2.529 ± 0.079           | 0.2 -                   | 8.1 ± 1.3               |

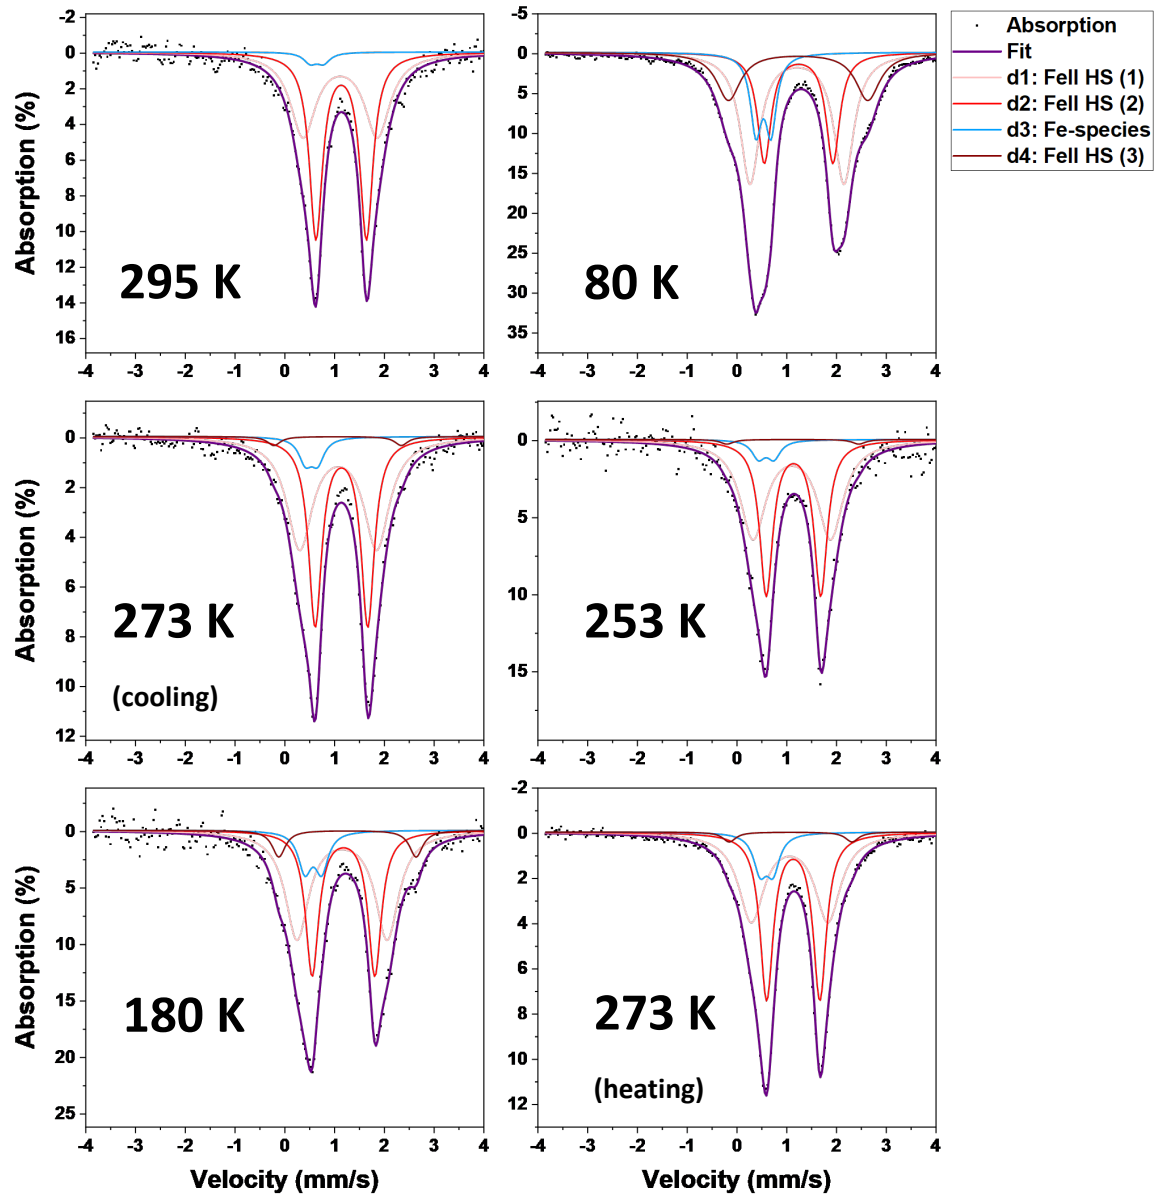

Supplementary Figure 26:  $^{57}\text{Fe}$  Mössbauer spectra of  $\{\text{Fe}(\text{NO}_2\text{-pbpy}^+)_2[\mu_2\text{-Ni}(\text{CN})_4]_2\}$  at selected temperatures, the sample is  $^{57}\text{Fe}$  enriched. Due to the hysteresis loop observed in optical measurements, the spectra at 253 K and 273 K (heating) were collected after the sample was cooled to 80 K.

Supplementary Table 3: Mössbauer parameters of doublets found in  $\{^{57}\text{Fe}(\text{NO}_2\text{-pbpy}^+)_2[\mu_2\text{-Ni}(\text{CN})_4]_2\}$ , see Supplementary Figure 26.

| Temperature (K) | CS (mm/s)               | QS (mm/s)               | width (mm/s)            | Population (%)          |
|-----------------|-------------------------|-------------------------|-------------------------|-------------------------|
|                 | Fe <sup>II</sup> HS (1) |
| 295             | 1.114 ± 0.020           | 1.493 ± 0.085           | 0.31 -                  | 45.2 ± 7.4              |
| 273             | 1.074 ± 0.007           | 1.547 ± 0.015           | 0.31 -                  | 49.1 ± 5.5              |
| 180             | 1.15 ± 0.021            | 1.81 ± 0.18             | 0.284 ± 0.044           | 47.6 ± 9.5              |
| 80              | 1.2068 ± 0.0034         | 1.888 ± 0.030           | 0.293 ± 0.024           | 42.1 ± 7.5              |
| 253             | 1.101 ± 0.031           | 1.56 ± 0.23             | 0.31 -                  | 52 ± 13                 |
| 273             | 1.058 ± 0.0081          | 1.539 ± 0.044           | 0.31 -                  | 44.4 ± 3.6              |
|                 | Fe <sup>II</sup> HS (2) |
| 295             | 1.1330 ± 0.0055         | 1.016 ± 0.013           | 0.16 -                  | 51.9 ± 6.1              |
| 273             | 1.1380 ± 0.0097         | 1.057 ± 0.022           | 0.16 -                  | 49.4 ± 4.4              |
| 180             | 1.1785 ± 0.0081         | 1.260 ± 0.024           | 0.16 -                  | 35.0 ± 5.9              |
| 80              | 1.2385 ± 0.0031         | 1.378 ± 0.022           | 0.165 ± 0.016           | 24.9 ± 5.5              |
| 253             | 1.136 ± 0.010           | 1.095 ± 0.027           | 0.16 -                  | 34 ± 10                 |
| 273             | 1.1305 ± 0.0031         | 1.0689 ± 0.0066         | 0.16 -                  | 52.9 ± 3.0              |
|                 | Fe-species              | Fe-species              | Fe-species              | Fe-species              |
| 295             | 0.64 ± 0.13             | 0.27 ± 0.29             | 0.16 -                  | 2.9 ± 1.6               |
| 273             | 0.536 ± 0.065           | 0.24 ± 0.18             | 0.16 -                  | 5.6 ± 1.1               |
| 180             | 0.572 ± 0.045           | 0.338 ± 0.089           | 0.16 -                  | 9.7 ± 1.8               |
| 80              | 0.5326 ± 0.0076         | 0.302 ± 0.011           | 0.1335 ± 0.0059         | 13.85 ± 0.39            |
| 253             | 0.59 ± 0.12             | 0.31 ± 0.29             | 0.16 -                  | 4.9 ± 2.6               |
| 273             | 0.594 ± 0.018           | 0.258 ± 0.045           | 0.16 -                  | 9.60 ± 0.68             |
|                 | Fe <sup>II</sup> HS (3) |
| 295             | - -                     | - -                     | - -                     | - -                     |
| 273             | 1.061 ± 0.095           | 2.56 ± 0.20             | 0.16 -                  | 2.1 ± 1.1               |
| 180             | 1.259 ± 0.047           | 2.758 ± 0.097           | 0.16 -                  | 6.7 ± 2.3               |
| 80              | 1.2290 ± 0.0088         | 2.800 ± 0.037           | 0.293 ± 0.024           | 19.2 ± 2.7              |
| 253             | 1.12 ± 0.35             | 2.65 ± 0.73             | 0.16 -                  | 1.3 ± 2.5               |
| 273             | 1.078 ± 0.045           | 2.466 ± 0.096           | 0.16 -                  | 2.59 ± 0.72             |

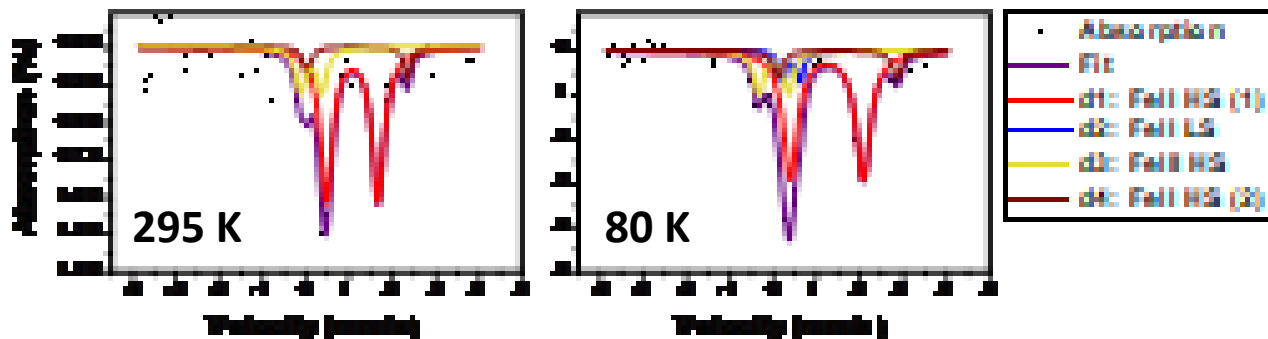

Supplementary Figure 27:  $^{57}\text{Fe}$  Mössbauer spectra of  $\{\text{Fe}(\text{COOCH}_3\text{-pbpy}^+)_2[\mu_2\text{-Ni}(\text{CN})_4]_2\}$  at 295 K and 80 K.

Supplementary Table 4: Mössbauer parameters of doublets found in  $\{\text{Fe}(\text{COOCH}_3\text{-pbpy}^+)_2[\mu_2\text{-Ni}(\text{CN})_4]_2\}$ , see Supplementary Figure 27.

| Temperature (K) | CS (mm/s)               | QS (mm/s)               | width (mm/s)            | Population (%)          |
|-----------------|-------------------------|-------------------------|-------------------------|-------------------------|
|                 | Fe <sup>II</sup> HS (1) |
| 80              | 1.238                   | ± 0.022                 | 1.692                   | ± 0.045                 |
| 295             | 1.076                   | ± 0.023                 | 1.203                   | ± 0.046                 |
|                 | Fe <sup>II</sup> LS     | Fe <sup>II</sup> LS     | Fe <sup>II</sup> LS     | Fe <sup>II</sup> LS     |
| 80              | 0.420 ± 0.039           | 0.397 ± 0.072           | 0.101 ± 0.056           | 7.8 ± 4.0               |
| 295             | - -                     | - -                     | - -                     | - -                     |
|                 | Fe <sup>III</sup>       | Fe <sup>III</sup>       | Fe <sup>III</sup>       | Fe <sup>III</sup>       |
| 80              | 0.000 ± 0.058           | 0.70 ± 0.11             | 0.141 ± 0.051           | 15.5 ± 4.6              |
| 295             | 0.120 ± 0.072           | 0.49 ± 0.13             | 0.14 ± 0.10             | 17.1 ± 7.9              |
|                 | Fe <sup>II</sup> HS (2) |
| 80              | 1.472 ± 0.049           | 2.752 ± 0.097           | 0.140 ± 0.077           | 9.5 ± 4.4               |
| 295             | 1.178 ± 0.074           | 2.300 ± 0.015           | 0.10 ± 0.11             | 8.6 ± 8.4               |

## 2.6 Raman spectroscopy

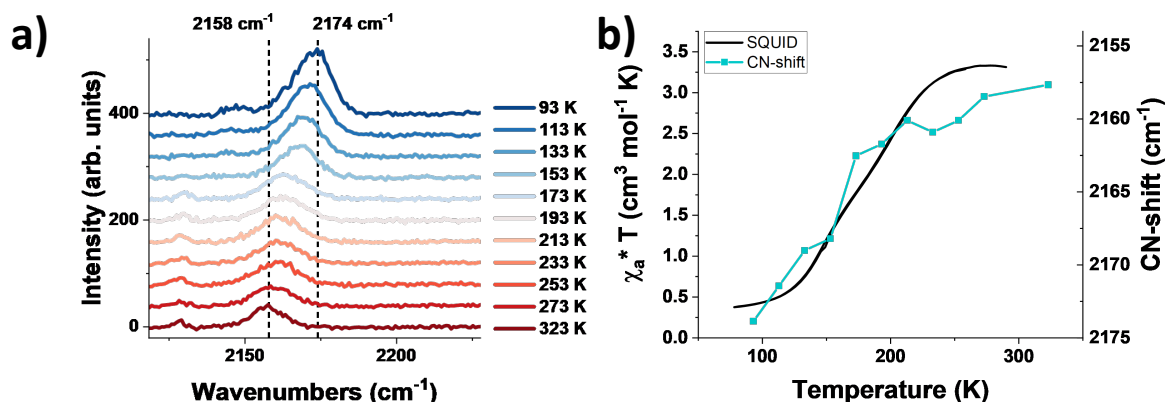

Supplementary Figure 28: a) Shift of the CN modes in temperature dependent Raman measurements of **1a** {Fe(CH<sub>3</sub>-pbpy<sup>+</sup>)<sub>2</sub>[μ<sub>2</sub>-Ni(CN)<sub>4</sub>]<sub>2</sub>·2H<sub>2</sub>O}. b) Comparison of the magnetic susceptibility to the shift of the CN modes in temperature for **1a**.

## 2.7 Infrared spectroscopy

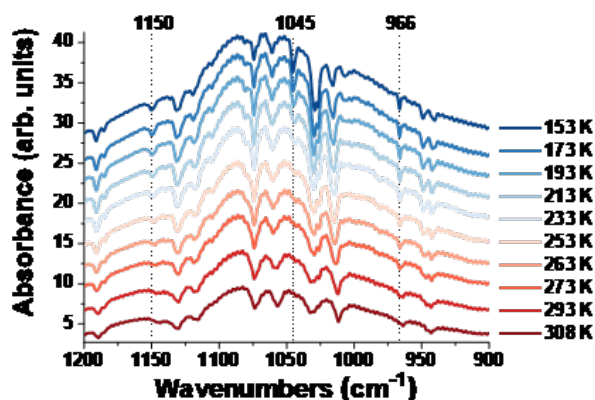

Supplementary Figure 29: Temperature dependent IR absorption spectra of **1a** {Fe(CH<sub>3</sub>-pbpy<sup>+</sup>)<sub>2</sub>[μ<sub>2</sub>-Ni(CN)<sub>4</sub>]<sub>2</sub>·2H<sub>2</sub>O}.

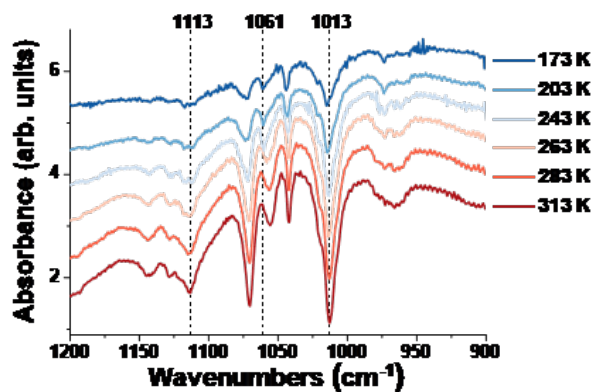

Supplementary Figure 30: Temperature dependent IR absorption spectra of **4a** {Fe(NO<sub>2</sub>-pbpy<sup>+</sup>)<sub>2</sub>[μ<sub>2</sub>-Ni(CN)<sub>4</sub>]<sub>2</sub>·2H<sub>2</sub>O}.

## 3 Supplementary Discussion

### 3.1 DFT

All calculations have been performed with the ADF program [1] using the statistical average of orbital potentials (SAOP) exchange-correlation potential and including scalar-relativistic effects within the zero-order regular approximation (ZORA) [2]. The atoms were described by relativistic all-electron Slater-type basis sets from the ADF program [3]: the TZP basis set of triple- $\zeta$  polarized quality was employed for the Fe and Pt atoms, and the DZP basis set of double- $\zeta$  polarized quality for the N, C and H atoms. The fragments were solvated in water using the conductor-like screening model of solvation (COSMO) [4]. The electronic absorption properties have been studied by performing electronic excitation calculations within linear response in time-dependent density functional theory (LR-TDDFT) [5] and the Tamm-Dancoff (TDA) approximation [6]. The analysis of the predicted transitions were done in terms of transition between occupied and virtual natural transition orbitals (NTO) [7]. The calculations were run restricted for the LS state and unrestricted for the considered HS state with the projection of the total spin moment  $S$  along the  $z$  axis constrained to  $MS = +S$ .

The  $\{\text{Fe}(\text{CH}_3\text{-pbpy}^+)_2[\mu_2\text{-Pt}(\text{CN})_4]_2 \cdot 2\text{H}_2\text{O}\}$  compound, has been modelled using a molecular fragment consisting of the Fe(II) ion, the two  $\text{CH}_3\text{-pbpy}^+$  ligands and the four neighbouring  $[\text{Pt}(\text{CN})_4]^-$  moieties: namely, the  $\{\text{Fe}(\text{CH}_3\text{-pbpy}^+)_2[\mu_2\text{-Pt}(\text{CN})_4]_4\}^{4-}$  complex. The complex has been studied in the LS state (total electronic spin  $S = 0$ ) and in the HS state ( $S = 2$ ). The adopted HS and LS geometries correspond to those found for this fragment in the crystal structures at 300 K and 150 K, respectively.

In order to get insight into the electronic absorption properties of the compound, linear response in time-dependent density functional theory (LR-TDDFT) has been applied to the characterization of the spectra of the LS and HS  $\{\text{Fe}(\text{CH}_3\text{-pbpy}^+)_2[\mu_2\text{-Pt}(\text{CN})_4]_4\}^{4-}$  complexes.

The influence of an electron transfer on the optical properties in the HS state has also been probed first by adding one electron to the system in the HS state, its spin being ferromagnetically coupled to the one of the magnetic center; that is,  $S = 5/2$  in the HS state. The plot of the spin density obtained by the SCF calculations shows that the additional electron goes to one of the  $\text{CH}_3\text{-pbpy}^+$  ligands yielding the  $\{\text{Fe}(\text{CH}_3\text{-pbpy}^+)(\text{CH}_3\text{-pbpy}^+)[\mu_2\text{-Pt}(\text{CN})_4]_4\}^{5-}$  complex. Unfortunately, the examination of the frontier molecular orbitals (MOs) shows that the  $\alpha$ -HOMO localized on the reduced  $\text{CH}_3\text{-pbpy}^+$  ligand is quasi-degenerate with the  $\alpha$ -LUMO of similar shape localized on the ligand. Therefore, the characterized electronic state is nearly degenerate with the one associated with the electron on the other  $\text{CH}_3\text{-pbpy}^+$  ligand. This near degeneracy invalidates the use of LR-TDDFT calculations and calls for the use of computationally more demanding multireference wavefunction-based methods. This observed equivalence of the  $\text{CH}_3\text{-pbpy}^+$  ligands is probably due to the fact that the adopted model does not fully account for the influence of the crystal packing and might hence be lifted by resorting to an extended model system, which includes neighbouring  $\text{CN}^-$  or  $\text{CH}_3\text{-pbpy}^+$  moieties, or which includes optimized point charges that help mimic the influence of the crystalline environment. The use of a multireference wavefunction-based method is beyond the scope of the present study, as is the use of a larger model. The more so as significant insight into the influence of an electron transfer on the optical properties could be gained by performing LR-TDDFT calculations on the doubly reduced HS fragment ( $S = 3$ )  $\{\text{Fe}(\text{CH}_3\text{-pbpy}^+)_2[\mu_2\text{-Pt}(\text{CN})_4]_4\}^{6-}$ . Table 1 shows the total electronic spin, the number of unpaired electrons on the Fe atom, and the isodensity plot as found for the considered HS fragments. For all fragments, there are about 4 unpaired electrons on the Fe atom, which is consistent with a HS Fe(II) center. Upon addition of one or two electrons, one or both  $\text{CH}_3\text{-pbpy}^+$  ligands are reduced respectively, as evidenced by the spin density found on the ligands.

Supplementary Table 5: Characterized HS fragments: total electronic spin  $S$ ; number  $n_{\alpha}(\text{Fe})$  of unpaired ( $\alpha$ ) electrons on the Fe atom as obtained from the post-SCF population analysis; plot of the spin density (SAOP results).

|                                                                                                                      | $S$ | $n_{\alpha}(\text{Fe})$ | spin density                                                                        |
|----------------------------------------------------------------------------------------------------------------------|-----|-------------------------|-------------------------------------------------------------------------------------|
| HS $\{\text{Fe}(\text{CH}_3\text{-pbpy}^+)_2[\mu_2\text{-Pt}(\text{CN})_4]_4\}^{4-}$                                 | 2   | 3.9e                    | 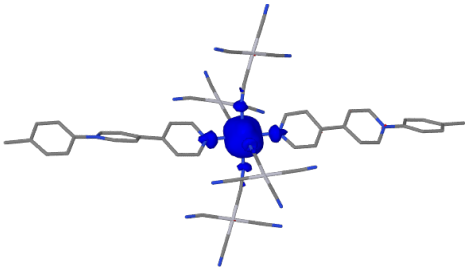  |
| HS $\{\text{Fe}(\text{CH}_3\text{-pbpy}^+)(\text{CH}_3\text{-pbpy}^{\cdot-})[\mu_2\text{-Pt}(\text{CN})_4]_4\}^{5-}$ | 5/2 | 3.8e                    |   |
| HS $\{\text{Fe}(\text{CH}_3\text{-pbpy}^{\cdot-})_2[\mu_2\text{-Pt}(\text{CN})_4]_4\}^{6-}$                          | 3   | 3.8e                    |  |

For the LS and HS fragments of  $\{\text{Fe}(\text{CH}_3\text{-pbpy}^+)_2[\mu_2\text{-Pt}(\text{CN})_4]_4\}^{4-}$  as well as the HS fragment  $\{\text{Fe}(\text{CH}_3\text{-pbpy}^{\cdot-})_2[\mu_2\text{-Pt}(\text{CN})_4]_4\}^{6-}$ , the energy and oscillator strength of 80 lowest-lying transitions were determined by the LR-TD-DFT calculations. Figure 8 in main text shows the LS and HS spectra obtained by convoluting the oscillator strengths with Gaussians having a full-width at half-maximum (FWHM) of  $2000\text{ cm}^{-1}$ .

The low-energy parts of the calculated spectra of LS  $\{\text{Fe}(\text{CH}_3\text{-pbpy}^+)_2[\mu_2\text{-Pt}(\text{CN})_4]_4\}^{4-}$  and HS  $\{\text{Fe}(\text{CH}_3\text{-pbpy}^+)_2[\mu_2\text{-Pt}(\text{CN})_4]_4\}^{4-}$  spectra are dominated by an intense  $\text{Fe} \rightarrow \text{CH}_3\text{-pbpy}^+$  MLCT transition located at 763 nm and 1185 nm, respectively (see Tables S2 and S3 which summarize the LR-TDDFT results for the 20 lowest-lying transitions in LS and in HS  $\{\text{Fe}(\text{CH}_3\text{-pbpy}^+)_2[\mu_2\text{-Pt}(\text{CN})_4]_4\}^{4-}$ , respectively). For LS (respectively, HS)  $\{\text{Fe}(\text{CH}_3\text{-pbpy}^+)_2[\mu_2\text{-Pt}(\text{CN})_4]_4\}^{4-}$ , this MLCT band corresponds to the experimental band whose intensity is observed at 580 nm (respectively, 1065 nm) and increases (respectively, decreases) with increasing temperature (compare Fig. 3(a)). The red-shift of the calculated spectra can be ascribed to the approximations underlying the LR-TD-DFT calculations and possibly to the use of a molecular fragment and hence to the neglect of the crystalline environment.

The features of the 30 lowest-lying transitions determined for the doubly reduced HS fragment  $\{\text{Fe}(\text{CH}_3\text{-pbpy}^{\cdot-})_2[\mu_2\text{-Pt}(\text{CN})_4]_4\}^{6-}$  are summarized in SI Supplementary Table 4. Its inspection shows that the two intense bands observed in the calculated spectrum of the reduced species (Fig. 4, yellow) are independent  $\pi \rightarrow \pi$  transitions occurring at 796 nm and 663 nm and centered each on one or the other reduced ligand. The overlap of these intra-ligand absorption bands with the MLCT



bands found in the calculated spectra of LS and HS  $\{\text{Fe}(\text{CH}_3\text{-pbpy}^+)_2[\mu_2\text{-Pt}(\text{CN})_4]_4\}^{4-}$  supports the conclusion drawn from the experiments that the temperature dependence of the absorption intensity at 785 nm is likely due to the presence of reduced  $\text{CH}_3\text{-pbpy}^+$  ligands at elevated temperatures.

Supplementary Table 6: Characterization of the 20 lowest-lying transitions in the LS  $\{\text{Fe}(\text{CH}_3\text{-pbpy}^+)_2[\mu_2\text{-Pt}(\text{CN})_4]_4\}^{4-}$  fragment with the transition energy (E), wavelength  $\lambda$ , oscillator strength (f), and the excited state; description in terms of transitions between occupied and virtual NTOs (SAOP results).

| E / cm <sup>-1</sup> | $\lambda$ / nm | f      | State            | NTO→NTO transitions |                                                                                      |           |
|----------------------|----------------|--------|------------------|---------------------|--------------------------------------------------------------------------------------|-----------|
|                      |                |        |                  | %                   | occupied                                                                             | → virtual |
| 12511                | 799            | 0.0001 | 1 <sup>1</sup> A | 100                 | 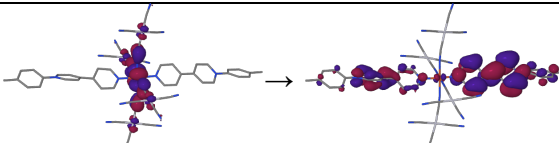   |           |
| 12781                | 782            | 0.0135 | 2 <sup>1</sup> A | 100                 |    |           |
| 13102                | 763            | 0.4059 | 3 <sup>1</sup> A | 99                  |   |           |
| 13418                | 745            | 0.0000 | 4 <sup>1</sup> A | 100                 |  |           |
| 13729                | 728            | 0.0010 | 5 <sup>1</sup> A | 100                 |  |           |
| 15269                | 655            | 0.0165 | 6 <sup>1</sup> A | 97                  |  |           |
| 21626                | 462            | 0.0037 | 7 <sup>1</sup> A | 100                 |  |           |
| 22952                | 436            | 0.0000 | 8 <sup>1</sup> A | 100                 |  |           |
| 23133                | 432            | 0.0028 | 9 <sup>1</sup> A | 93                  |  |           |

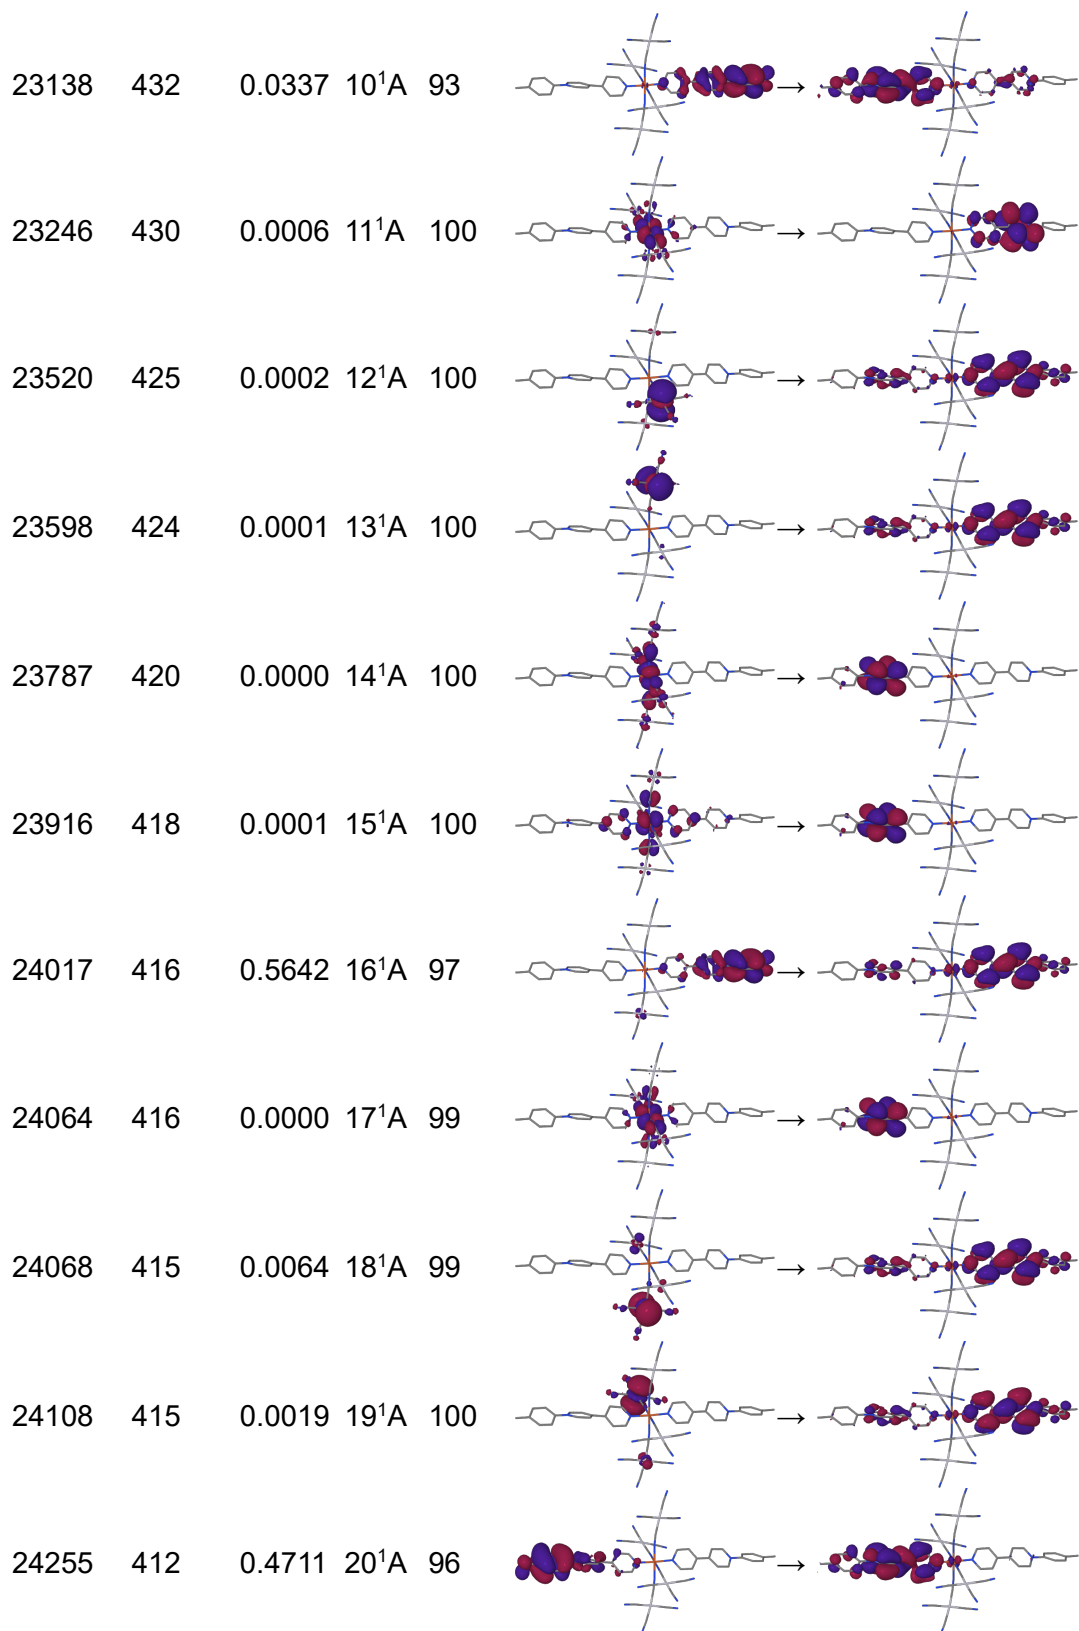

Supplementary Table 7: Characterization of the 20 lowest-lying transitions in the HS  $\{\text{Fe}(\text{CH}_3\text{-pbpy}^+)_2[\mu_2\text{-Pt}(\text{CN})_4]_4\}$  fragment with the transition energy (E), wavelength  $\lambda$ , oscillator strength (f), and the excited state; description in terms of transitions between occupied and virtual NTOs (SAOP results).

| E / $\text{cm}^{-1}$ | $\lambda$ / nm | f      | State         | NTO $\rightarrow$ NTO transitions |          |          |                       |
|----------------------|----------------|--------|---------------|-----------------------------------|----------|----------|-----------------------|
|                      |                |        |               | %                                 | Spin     | occupied | $\rightarrow$ virtual |
| 8439                 | 1185           | 0.2237 | $1^5\text{A}$ | 100                               | $\beta$  |          |                       |
| 10926                | 915            | 0.0197 | $2^5\text{A}$ | 97                                | $\beta$  |          |                       |
| 12959                | 772            | 0.0002 | $3^5\text{A}$ | 100                               | $\beta$  |          |                       |
| 13253                | 755            | 0.0001 | $4^5\text{A}$ | 100                               | $\beta$  |          |                       |
| 15842                | 631            | 0.0023 | $5^5\text{A}$ | 100                               | $\alpha$ |          |                       |
| 18005                | 555            | 0.0004 | $6^5\text{A}$ | 100                               | $\alpha$ |          |                       |
| 18835                | 531            | 0.0370 | $7^5\text{A}$ | 69                                | $\alpha$ |          |                       |
|                      |                |        |               | 31                                | $\beta$  |          |                       |
| 20259                | 494            | 0.0003 | $8^5\text{A}$ | 99                                | $\alpha$ |          |                       |
| 20502                | 488            | 0.0180 | $9^5\text{A}$ | 99                                | $\beta$  |          |                       |

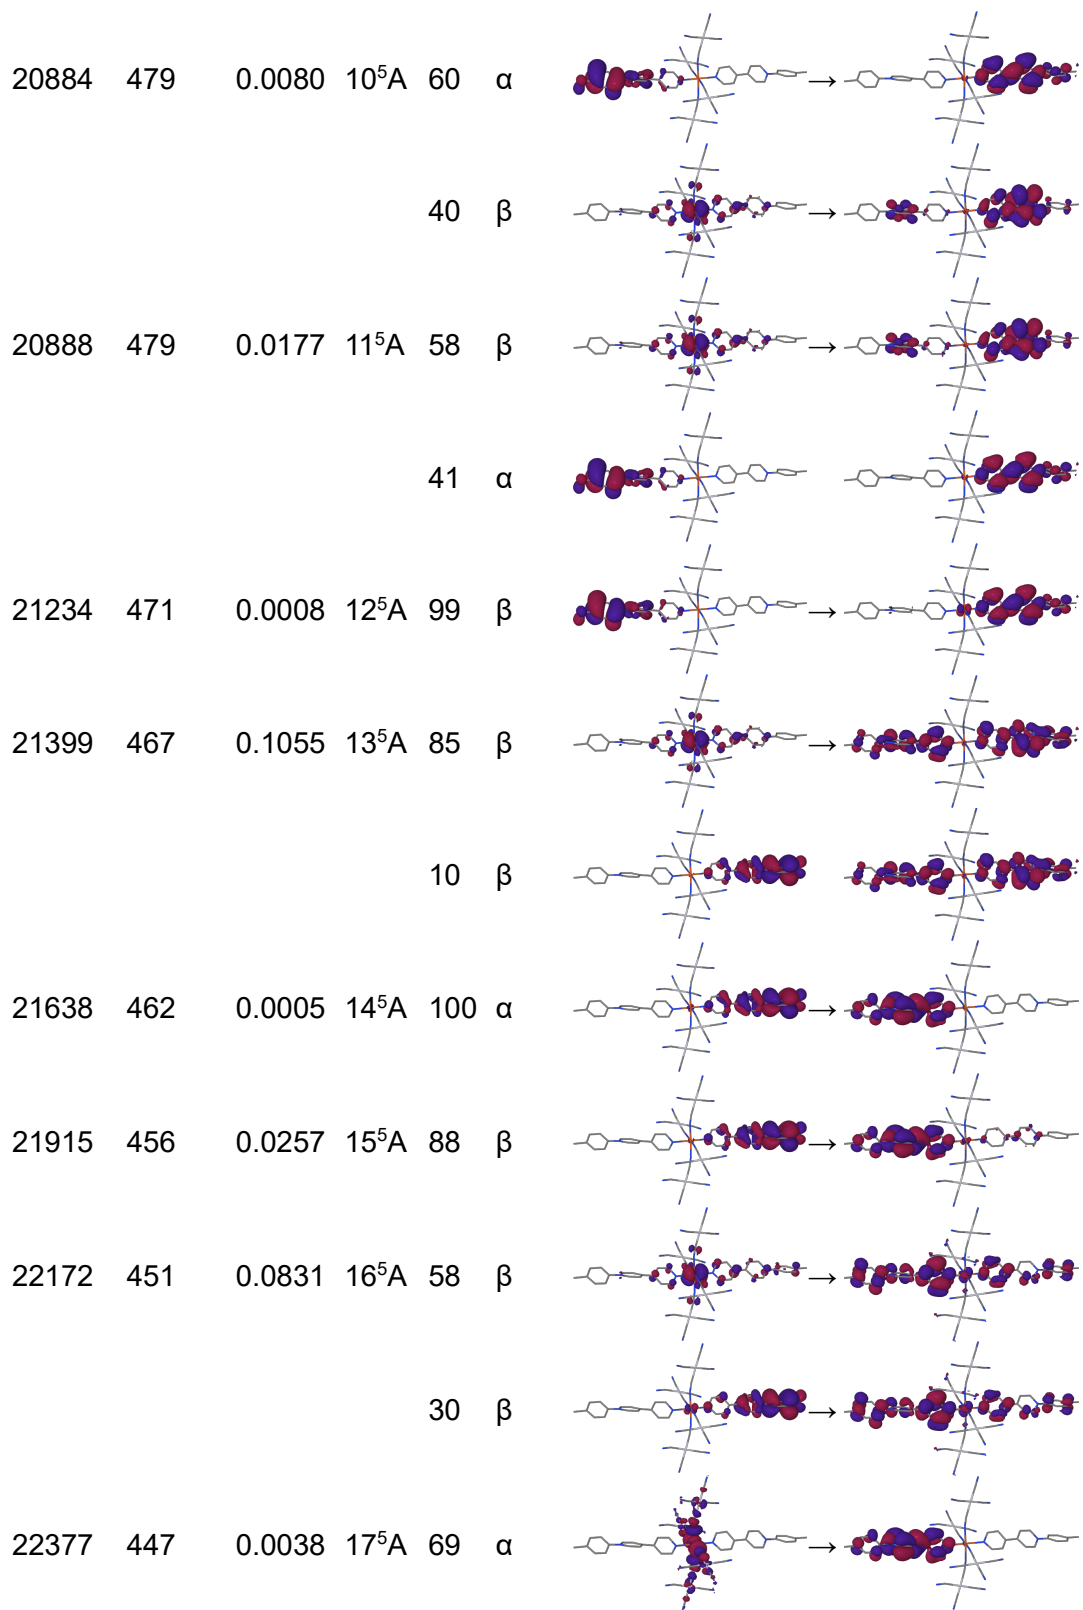

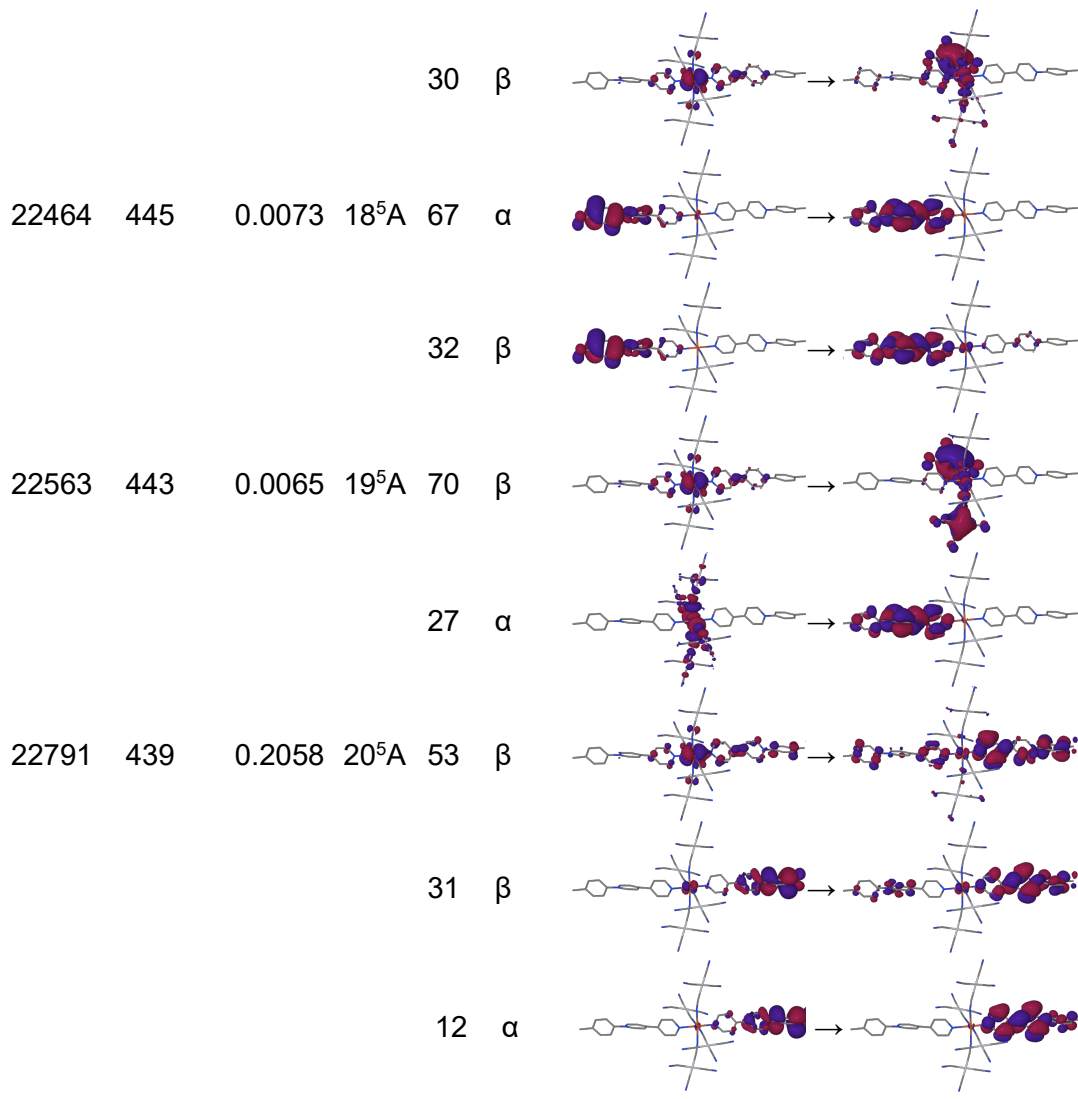

Supplementary Table 8: Characterization of the 30 lowest-lying transitions in the HS  $\{\text{Fe}(\text{CH}_3\text{-pbpy}^*)_2[\mu_2\text{-Pt}(\text{CN})_4]_4\}^{6-}$  fragment with the transition energy (E), wavelength  $\lambda$ , oscillator strength (f) and the excited state; description in terms of transitions between occupied and virtual NTOs (SAOP results).

| E / $\text{cm}^{-1}$ | $\lambda$ / nm | f      | State          | NTO→NTO transitions |          |                    |
|----------------------|----------------|--------|----------------|---------------------|----------|--------------------|
|                      |                |        |                | %                   | Spin     | occupied → virtual |
| 8670                 | 1153           | 0.0002 | $1^7\text{A}$  | 100                 | $\beta$  |                    |
| 9294                 | 1076           | 0.0014 | $2^7\text{A}$  | 100                 | $\alpha$ |                    |
| 9572                 | 1045           | 0.0001 | $3^7\text{A}$  | 100                 | $\alpha$ |                    |
| 10430                | 959            | 0.0006 | $4^7\text{A}$  | 100                 | $\alpha$ |                    |
| 10894                | 918            | 0.0002 | $5^7\text{A}$  | 100                 | $\alpha$ |                    |
| 11513                | 869            | 0.0019 | $6^7\text{A}$  | 100                 | $\alpha$ |                    |
| 11741                | 852            | 0.0000 | $7^7\text{A}$  | 100                 | $\beta$  |                    |
| 11890                | 841            | 0.0004 | $8^7\text{A}$  | 100                 | $\alpha$ |                    |
| 12174                | 821            | 0.0009 | $9^7\text{A}$  | 100                 | $\alpha$ |                    |
| 12283                | 814            | 0.0003 | $10^7\text{A}$ | 100                 | $\beta$  |                    |

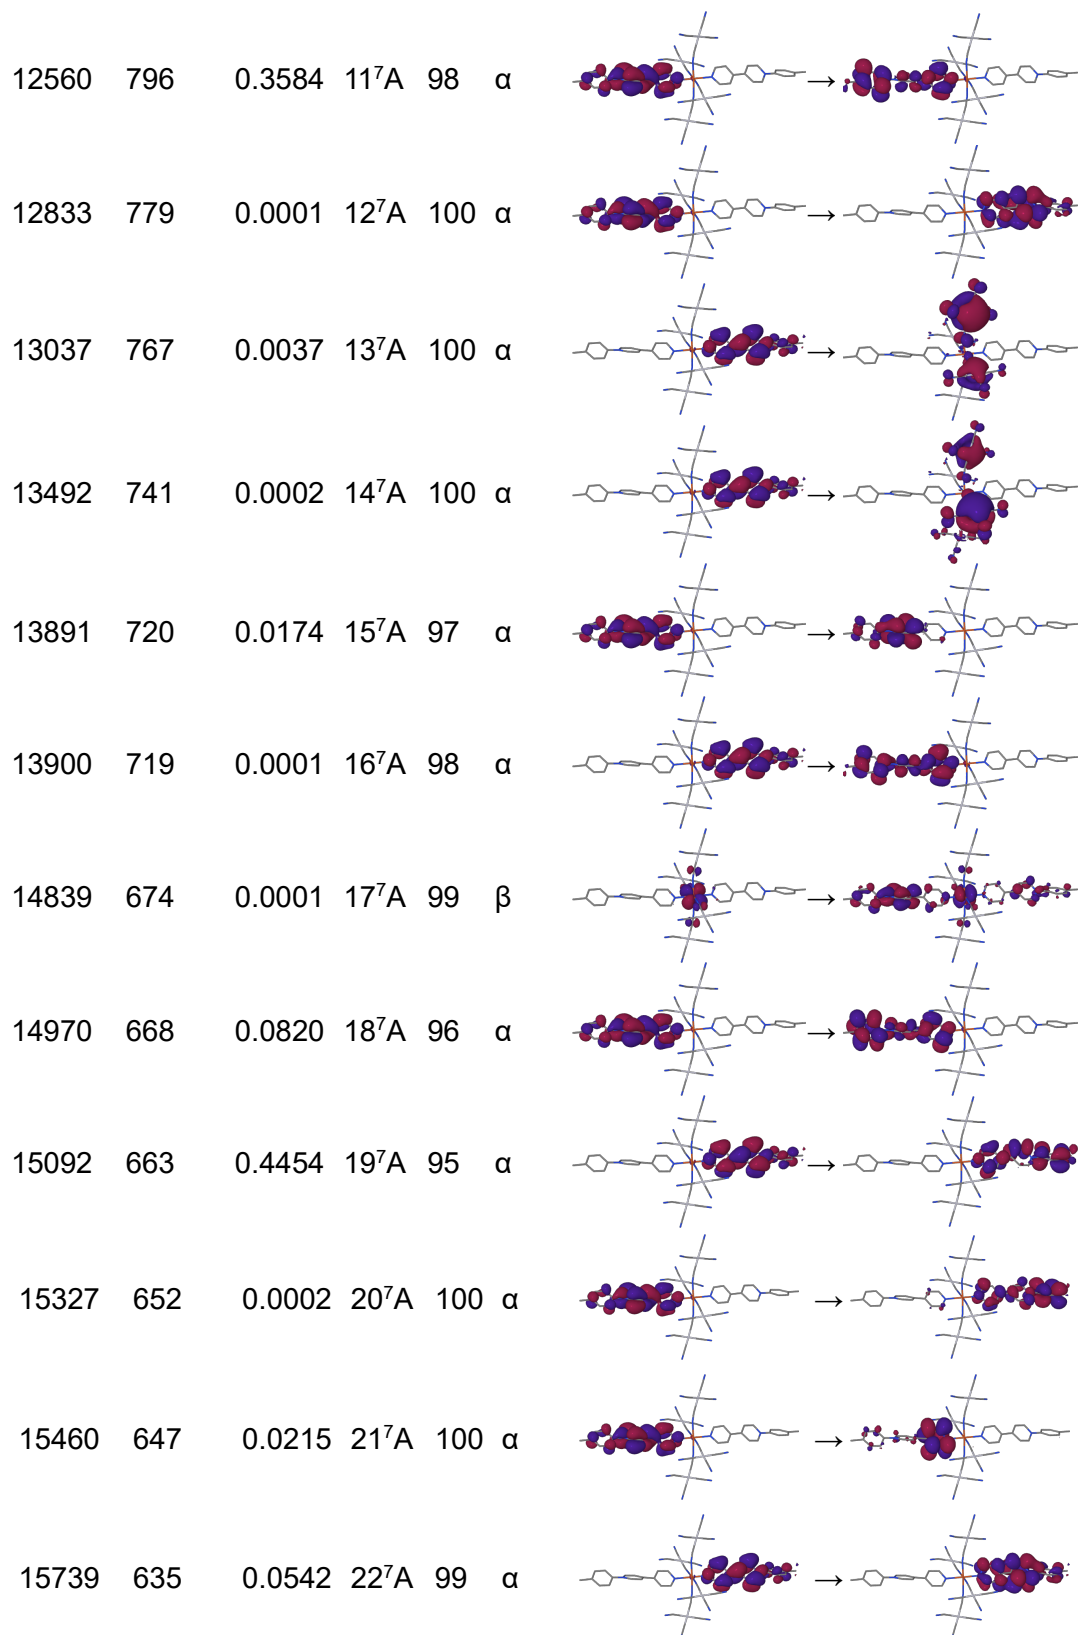

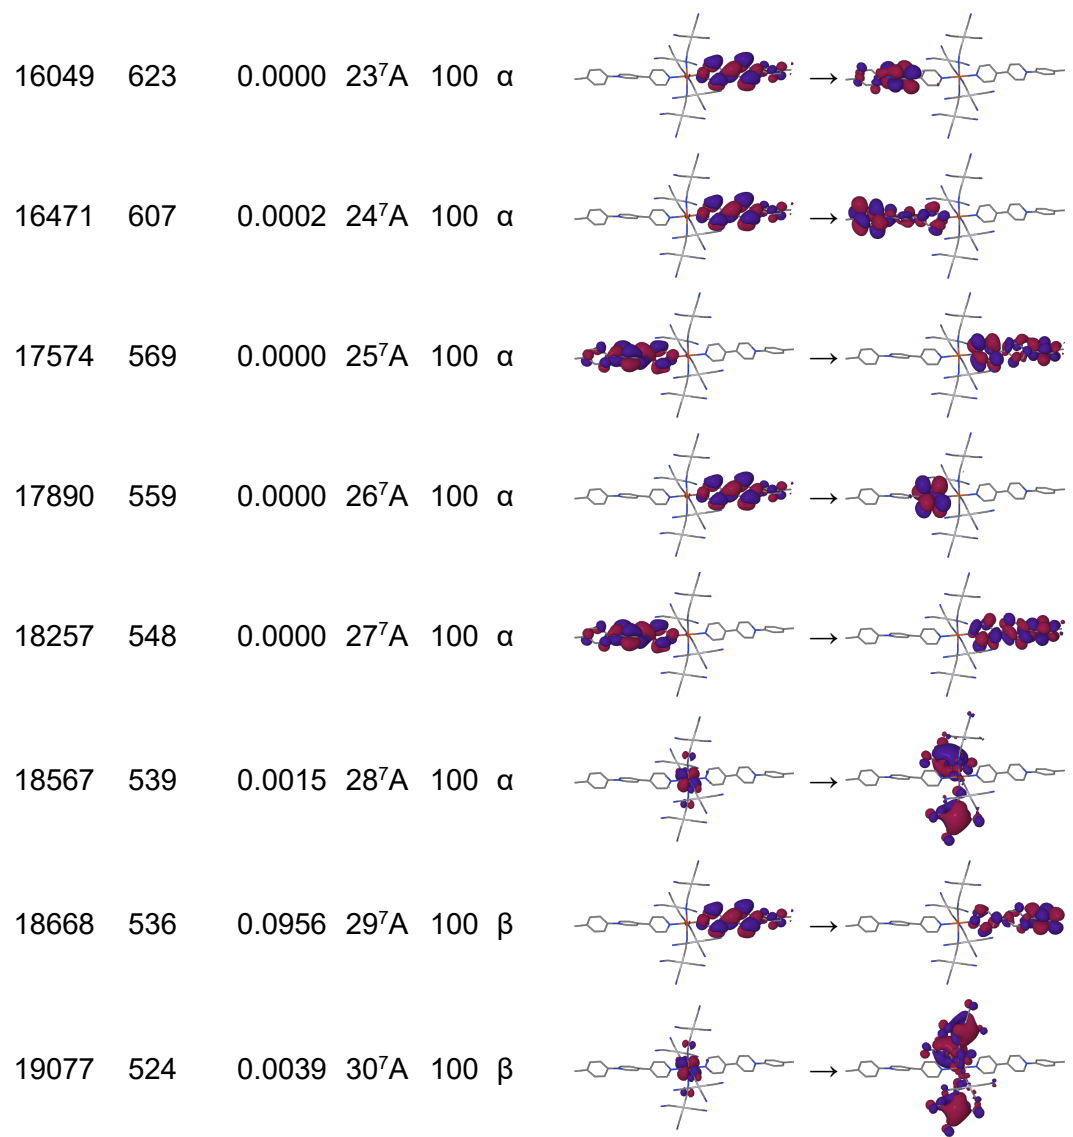



## 4 Supplementary Tables

### 4.1 Single Crystal X-Ray Diffraction

For single crystal XRD, the crystals were kept in their mother liquor until they were dipped into perfluoropolyether oil and their structure was determined. The chosen crystals were mounted on a Mitegen micromount. Data were collected at different temperatures (from 100 K to 300 K) on a XtaLAB Synergy (Rigaku) diffractometer using either a Cu-K $\alpha$  radiation ( $\lambda = 1.54184 \text{ \AA}$ ) or a Mo-K $\alpha$  radiation ( $\lambda = 0.71073 \text{ \AA}$ ) micro-source, equipped with an Oxford Cryosystems Cooler Device. The structures have been solved using the new dual-space algorithm program SHELXT [8] and refined by means of least-squares procedures using SHELXL-2018[8] program included either in the software package WinGX [9] version 1.639 or the package OLEX2 [10]. The Atomic Scattering Factors were taken from International Tables for X-Ray Crystallography [11]. Hydrogen atoms were placed geometrically and refined using a riding model, except for the hydrogens of water molecules which were located by Fourier Differences. All non-hydrogen atoms were anisotropically refined. Ellipsoid plots in the figures of the crystallography section were generated using the software ORTEP-3 [12]. The crystal structures have been deposited at the Cambridge Crystallographic Data Centre and allocated the deposition numbers 2321396-2321412, 2327738, 2327739 and 2355273.

Supplementary Table 9: Selected temperatures for  $\{\text{Fe}(\text{CH}_3\text{-pbpy}^+)\}_2[\mu_2\text{-Pt}(\text{CN})_4]_2 \cdot 2\text{H}_2\text{O}$ ; measurements were done from 150 to 290 K every 10 K.

| Temperature, K                                     | 150(2)                                                                                  | 200(2)            | 210(2)            | 250(2)            | 270(2)            |
|----------------------------------------------------|-----------------------------------------------------------------------------------------|-------------------|-------------------|-------------------|-------------------|
| formula                                            | $\text{C}_{42}\text{H}_{30}\text{N}_{12}\text{Pt}_2\text{Fe} \cdot 2\text{H}_2\text{O}$ |                   |                   |                   |                   |
| fw, g/mol                                          | 1184.82                                                                                 | 1184.82           | 1184.82           | 1184.82           | 1184.82           |
| crystal size, mm                                   | 0.4x0.4x0.1                                                                             | 0.4x0.4x0.1       | 0.4x0.4x0.1       | 0.4x0.4x0.1       | 0.4x0.4x0.1       |
| crystal colour                                     | orange                                                                                  | orange            | orange            | orange            | orange            |
| crystal system                                     | monoclinic                                                                              | monoclinic        | monoclinic        | monoclinic        | monoclinic        |
| space group, Z                                     | <i>P21/c</i> , 4                                                                        | <i>P21/c</i> , 4  | <i>P21/c</i> , 4  | <i>P21/c</i> , 4  | <i>P21/c</i> , 4  |
| <i>a</i> , Å                                       | 20.8823(3)                                                                              | 20.8921(2)        | 20.8823(3)        | 20.8819(2)        | 20.8823(3)        |
| <i>b</i> , Å                                       | 12.9944(2)                                                                              | 13.05940(10)      | 12.9944(2)        | 13.12160(10)      | 12.9944(2)        |
| <i>c</i> , Å                                       | 15.2591(2)                                                                              | 15.60910(10)      | 15.2591(2)        | 15.85790(10)      | 15.2591(2)        |
| $\alpha$ , °                                       | 90                                                                                      | 90                | 90                | 90                | 90                |
| $\beta$ , °                                        | 93.746(2)                                                                               | 93.2780(10)       | 93.746(2)         | 92.8690(10)       | 93.746(2)         |
| $\gamma$ , °                                       | 90                                                                                      | 90                | 90                | 90                | 90                |
| <i>V</i> , Å <sup>3</sup>                          | 4131.75(10)                                                                             | 4251.79(6)        | 4131.75(10)       | 4339.68(6)        | 4131.75(10)       |
| $\rho$ , g/cm <sup>3</sup>                         | 1.905                                                                                   | 1.851             | 1.905             | 1.813             | 1.905             |
| $\mu$ , mm <sup>-1</sup>                           | 15.614                                                                                  | 15.173            | 15.614            | 14.866            | 15.614            |
| F(000)                                             | 2272                                                                                    | 2272              | 2272              | 2272              | 2272              |
| $\theta$ max, °                                    | 77.041                                                                                  | 76.754            | 77.041            | 76.594            | 77.041            |
| limiting indices                                   | -26⇒ <i>h</i> ⇒26                                                                       | -26⇒ <i>h</i> ⇒26 | -26⇒ <i>h</i> ⇒26 | -26⇒ <i>h</i> ⇒26 | -26⇒ <i>h</i> ⇒26 |
|                                                    | -16⇒ <i>k</i> ⇒7                                                                        | -16⇒ <i>k</i> ⇒7  | -16⇒ <i>k</i> ⇒7  | -16⇒ <i>k</i> ⇒7  | -16⇒ <i>k</i> ⇒7  |
|                                                    | -18⇒ <i>l</i> ⇒19                                                                       | -19⇒ <i>l</i> ⇒19 | -18⇒ <i>l</i> ⇒19 | -19⇒ <i>l</i> ⇒20 | -18⇒ <i>l</i> ⇒19 |
| reflections collected                              | 8363                                                                                    | 8588              | 8363              | 8724              | 8363              |
| <i>R</i> <sub>int</sub>                            | 0.0615                                                                                  | 0.0387            | 0.0615            | 0.0381            | 0.0615            |
| data/parameters                                    | 7573/581                                                                                | 7822/581          | 7573/581          | 7617/581          | 7573/581          |
| GOF on <i>F</i> <sup>2</sup>                       | 1.099                                                                                   | 1.037             | 1.099             | 1.059             | 1.099             |
| <i>R</i> <sub>1</sub> [ <i>I</i> > 2σ( <i>I</i> )] | 0.0605                                                                                  | 0.0345            | 0.0605            | 0.0364            | 0.0605            |
| <i>R</i> <sub>1</sub> (all data)                   | 0.0658                                                                                  | 0.0378            | 0.0658            | 0.0427            | 0.0658            |
| <i>wR</i> <sub>2</sub> (all data)                  | 0.1826                                                                                  | 0.0974            | 0.1826            | 0.0997            | 0.1826            |
| completeness to theta max                          | 95.5 %                                                                                  | 95.6 %            | 95.5 %            | 95.3 %            | 95.5 %            |
| lrgst diff peak, e/Å <sup>3</sup>                  | 3.49                                                                                    | 1.65              | 3.49              | 0.93              | 3.49              |
| lrgst diff hole, e/Å <sup>3</sup>                  | -3.59                                                                                   | -1.01             | -3.59             | -1.18             | -3.59             |

Supplementary Table 10: {Fe(**Br-pbpy**<sup>+</sup>)<sub>2</sub>[μ<sub>2</sub>-Pt(CN)<sub>4</sub>]<sub>2</sub>·2H<sub>2</sub>O}.

| Temperature, K                                     | 100(2)                                                                                                 | 300(2)                    |
|----------------------------------------------------|--------------------------------------------------------------------------------------------------------|---------------------------|
| formula                                            | C <sub>40</sub> H <sub>24</sub> Br <sub>2</sub> N <sub>12</sub> Pt <sub>2</sub> Fe · 2H <sub>2</sub> O |                           |
| fw, g/mol                                          | 1314.56                                                                                                | 1314.56                   |
| crystal size, mm                                   | 0.4x0.4x0.1                                                                                            | 0.4x0.4x0.1               |
| crystal colour                                     | orange                                                                                                 | orange                    |
| crystal system                                     | monoclinic                                                                                             | monoclinic                |
| space group, Z                                     | <i>P</i> 21/ <i>c</i> , 4                                                                              | <i>P</i> 21/ <i>c</i> , 4 |
| <i>a</i> , Å                                       | 21.1504(2)                                                                                             | 21.1717(3)                |
| <i>b</i> , Å                                       | 12.97260(10)                                                                                           | 13.2584(2)                |
| <i>c</i> , Å                                       | 15.22460(10)                                                                                           | 15.7335(2)                |
| $\alpha$ , °                                       | 90                                                                                                     | 90                        |
| $\beta$ , °                                        | 93.1490(10)                                                                                            | 91.7430(10)               |
| $\gamma$ , °                                       | 90                                                                                                     | 90                        |
| <i>V</i> , Å <sup>3</sup>                          | 4170.95(6)                                                                                             | 4414.39(11)               |
| $\rho$ , g/cm <sup>3</sup>                         | 2.132                                                                                                  | 2.026                     |
| $\mu$ , mm <sup>-1</sup>                           | 17.730                                                                                                 | 16.791                    |
| F(000)                                             | 2528                                                                                                   | 2544                      |
| $\theta$ max, °                                    | 77.370                                                                                                 | 77.383                    |
|                                                    | -26⇒ <i>h</i> ⇒25                                                                                      | -25⇒ <i>h</i> ⇒26         |
| limiting indices                                   | -16⇒ <i>k</i> ⇒13                                                                                      | -16⇒ <i>k</i> ⇒-15        |
|                                                    | -19⇒ <i>l</i> ⇒17                                                                                      | -19⇒ <i>l</i> ⇒18         |
| reflections collected                              | 8098                                                                                                   | 8411                      |
| <i>R</i> <sub>int</sub>                            | 0.0395                                                                                                 | 0.0505                    |
| data/parameters                                    | 7961/545                                                                                               | 7401/545                  |
| GOF on <i>F</i> <sup>2</sup>                       | 1.140                                                                                                  | 1.040                     |
| <i>R</i> <sub>1</sub> [ <i>I</i> > 2σ( <i>I</i> )] | 0.0415                                                                                                 | 0.0456                    |
| <i>R</i> <sub>1</sub> (all data)                   | 0.0420                                                                                                 | 0.0519                    |
| <i>wR</i> <sub>2</sub> (all data)                  | 0.1142                                                                                                 | 0.1397                    |
| completeness to theta max                          | 99.8 %                                                                                                 | 97.7 %                    |
| largst diff peak, e/Å <sup>3</sup>                 | 2.82                                                                                                   | 1.56                      |
| largst diff hole, e/Å <sup>3</sup>                 | -1.32                                                                                                  | -1.86                     |

Supplementary Table 11: {Zn(**Br-pbpy**<sup>+</sup>)<sub>2</sub>[μ<sub>2</sub>-Pt(CN)<sub>4</sub>]<sub>2</sub>·2H<sub>2</sub>O}.

|                                   |                                                                                                        |
|-----------------------------------|--------------------------------------------------------------------------------------------------------|
| Temperature, K                    | 300(2)                                                                                                 |
| formula                           | C <sub>40</sub> H <sub>24</sub> Br <sub>2</sub> N <sub>12</sub> Pt <sub>2</sub> Zn·2(H <sub>2</sub> O) |
| fw, g/mol                         | 1324.11                                                                                                |
| crystal size, mm                  | 0.15 × 0.15 × 0.03                                                                                     |
| crystal colour                    | colourless                                                                                             |
| crystal system                    | monoclinic                                                                                             |
| space group, Z                    | <i>P</i> 21/ <i>c</i> , 4                                                                              |
| <i>a</i> , Å                      | 21.2020(1)                                                                                             |
| <i>b</i> , Å                      | 13.2285(1)                                                                                             |
| <i>c</i> , Å                      | 15.7562(1)                                                                                             |
| α, °                              | 90                                                                                                     |
| β, °                              | 92.096(1)                                                                                              |
| γ, °                              | 90                                                                                                     |
| <i>V</i> , Å <sup>3</sup>         | 4419.53(5)                                                                                             |
| ρ, g/cm <sup>3</sup>              | 1.990                                                                                                  |
| μ, mm <sup>-1</sup>               | 14.75                                                                                                  |
| F(000)                            | 2496                                                                                                   |
| θ max, °                          | 66.6°                                                                                                  |
| limiting indices                  | -25⇒h⇒25<br>-15⇒k⇒14<br>-17⇒l⇒18                                                                       |
| reflections collected             | 66584                                                                                                  |
| R <sub>int</sub>                  | 0.054                                                                                                  |
| data/parameters                   | 7812/532                                                                                               |
| GOF on F <sup>2</sup>             | 1.11                                                                                                   |
| R <sub>1</sub> [I > 2σ(I)]        | 0.032                                                                                                  |
| R <sub>1</sub> (all data)         | 0.0337                                                                                                 |
| wR <sub>2</sub> (all data)        | 0.084                                                                                                  |
| completeness to theta max         | 1.000                                                                                                  |
| lrgst diff peak, e/Å <sup>3</sup> | 1.48                                                                                                   |
| lrgst diff hole, e/Å <sup>3</sup> | -1.39                                                                                                  |

Supplementary Table 12: Fe(COOCH<sub>3</sub>-pbpy<sup>+</sup>)<sub>2</sub>[μ<sub>2</sub>-Pt(CN)<sub>4</sub>]<sub>2</sub>·2H<sub>2</sub>O}.

| Temperature, K                              | 100(2)                                                                                              | 300(2)                    |
|---------------------------------------------|-----------------------------------------------------------------------------------------------------|---------------------------|
| formula                                     | C <sub>44</sub> H <sub>30</sub> FeN <sub>12</sub> O <sub>4</sub> Pt <sub>2</sub> ·2H <sub>2</sub> O |                           |
| fw, g/mol                                   | 1236.81                                                                                             | 1236.81                   |
| crystal size, mm                            | 0.15 × 0.12 × 0.03                                                                                  | 0.15 × 0.12 × 0.03        |
| crystal colour                              | red                                                                                                 | pink                      |
| crystal system                              | Monoclinic                                                                                          | Monoclinic                |
| space group, Z                              | <i>P</i> 21/ <i>n</i> , 2                                                                           | <i>P</i> 21/ <i>n</i> , 2 |
| <i>a</i> , Å,                               | 11.6023(4)                                                                                          | 12.0484(5)                |
| <i>b</i> , Å                                | 14.4285(4)                                                                                          | 14.6058(5)                |
| <i>c</i> , Å                                | 14.1552(4)                                                                                          | 14.0583(5)                |
| α, °                                        | 90                                                                                                  | 90                        |
| β, °                                        | 110.535(3)                                                                                          | 111.665(4)                |
| γ, °                                        | 90                                                                                                  | 90                        |
| <i>V</i> , Å <sup>3</sup>                   | 2219.06(12)                                                                                         | 2299.17(16)               |
| ρ, g/cm <sup>3</sup>                        | 1.911                                                                                               | 1.844                     |
| μ, mm <sup>-1</sup>                         | 14.66                                                                                               | 14.15                     |
| F(000)                                      | 1224                                                                                                | 1232                      |
| θ max, °                                    | 65.1                                                                                                | 65.1                      |
|                                             | -14⇒h⇒14                                                                                            | -15⇒h⇒15                  |
| limiting indices                            | -14⇒k⇒17                                                                                            | -15⇒k⇒18                  |
|                                             | -17⇒l⇒17                                                                                            | -17⇒l⇒17                  |
| reflections collected                       | 37346                                                                                               | 3921                      |
| R <sub>int</sub>                            | 0.047                                                                                               | 0.059                     |
| data/parameters                             | 3784/277                                                                                            | 3921/287                  |
| GOF on F <sup>2</sup>                       | 1.08                                                                                                | 1.12                      |
| R <sub>1</sub> [ <i>I</i> > 2σ( <i>I</i> )] | 0.054                                                                                               | 0.050                     |
| R <sub>1</sub> (all data)                   | 0.0575                                                                                              | 0.0527                    |
| wR <sub>2</sub> (all data)                  | 0.124                                                                                               | 0.131                     |
| completeness to theta max                   | 0.999                                                                                               | 0.999                     |
| lrgst diff peak, e/Å <sup>3</sup>           | 1.77                                                                                                | 1.66                      |
| lrgst diff hole, e/Å <sup>3</sup>           | -1.24                                                                                               | -1.37                     |

## 5 Supplementary References

- [1] (a) G. te Velde, F.M. Bickelhaupt, E.J. Baerends, C. Fonseca Guerra, S.J.A. van Gisbergen, J.G. Snijders and T. Ziegler, *Chemistry with ADF*, *J. Comput. Chem.* **22**, 931 (2001). DOI:10.1002/jcc.1056. (b) ADF 2021, SCM, Theoretical Chemistry, Vrije Universiteit, Amsterdam, The Netherlands, <http://www.scm.com>. Authors and contributors: E.J. Baerends, T. Ziegler, A.J. Atkins, J. Autschbach, O. Baseggio, D. Bashford, A. Bérces, F.M. Bickelhaupt, C. Bo, P.M. Boerrigter, C. Cappelli, L. Cavallo, C. Daul, D.P. Chong, D.V. Chulhai, L. Deng, R.M. Dickson, J.M. Dieterich, F. Egidi, D.E. Ellis, M. van Faassen, L. Fan, T.H. Fischer, A. Förster, C. Fonseca Guerra, M. Franchini, A. Ghysels, A. Giammona, S.J.A. van Gisbergen, A. Goetz, A.W. Götz, J.A. Groeneveld, O.V. Gritsenko, M. Grüning, S. Gusarov, F.E. Harris, P. van den Hoek, Z. Hu, C.R. Jacob, H. Jacobsen, L. Jensen, L. Joubert, J.W. Kaminski, G. van Kessel, C. König, F. Kootstra, A. Kovalenko, M.V. Krykunov, P. Lafiosca, E. van Lenthe, D.A. McCormack, M. Medves, A. Michalak, M. Mitoraj, S.M. Morton, J. Neugebauer, V.P. Nicu, L. Noodleman, V.P. Osinga, S. Patchkovskii, M. Pavanello, C.A. Peeples, P.H.T. Philipsen, D. Post, C.C. Pye, H. Ramanantoanina, P. Ramos, W. Ravenek, M. Reimann, J.I. Rodríguez, P. Ros, R. Rüger, P.R.T. Schipper, D. Schlüns, H. van Schoot, G. Schreckenbach, J.S. Seldenthuis, M. Seth, J.G. Snijders, M. Solà, M. Stener, M. Swart, D. Swerhone, V. Tognetti, G. te Velde, P. Vernooijs, L. Versluis, L. Visscher, O. Visser, F. Wang, T.A. Wesolowski, E.M. van Wezenbeek, G. Wiesenekker, S.K. Wolff, T.K. Woo, A.L. Yakovlev
- [2] (a) E. van Lenthe, E.J. Baerends and J.G. Snijders, *Relativistic regular two-component Hamiltonians*, *J. Chem. Phys.* **99**, 4597 (1993); DOI: 10.1063/1.466059 (b) A. Rosa, E.J. Baerends, S.J.A. van Gisbergen, E. van Lenthe, J.A. Groeneveld and J. G. Snijders, *Article Electronic Spectra of  $M(\text{CO})_6$  ( $M = \text{Cr}, \text{Mo}, \text{W}$ ) Revisited by a Relativistic TDDFT Approach*, *J. Am. Chem. Soc.* **121**, 10356 (1999); DOI: 10.1021/ja990747t
- [3] E. van Lenthe and E.J. Baerends, *Optimized Slater-type basis sets for the elements 1-118*, *J. Comput. Chem.* **24**, 1142 (2003); DOI: 10.1002/jcc.10255
- [4] C.C. Pye and T. Ziegler, *An implementation of the conductor-like screening model of solvation within the Amsterdam density functional package*, *Theor. Chem. Acc.* **101**, 396 (1999); DOI: 10.1007/s002140050457
- [5] (a) M. E. Casida, Time-dependent density functional response theory for molecules, in: D. P. Chong (Ed.), *Recent Advances in Density Functional Methods*, Vol. 1, World Scientific, Singapore, 1995, pp. 155–192. (b) S.J.A. van Gisbergen, J.G. Snijders and E.J. Baerends, *Implementation of time-dependent density functional response equations*, *Comput. Phys. Commun.* **118**, 119 (1999); DOI: 10.1016/S0010-4655(99)00187-3
- [6] S. Hirata and M. Head-Gordon, *Time-dependent density functional theory within the Tamm-Dancoff approximation*, *Chem. Phys. Lett.* **314**, 291 (1999); DOI: 10.1016/S0009-2614(99)01149-5
- [7] R.L. Martin, *Natural transition orbitals*, *J. Chem. Phys.* **118**, 4775 (2003); DOI: 10.1063/1.1558471
- [8] G. M. Sheldrick, *Acta Cryst A* **2015**, *71*, 3–8.
- [9] L. J. Farrugia, *J. Appl. Cryst.* **1999**, *32*, 837–838.
- [10] Olex2 1.5 (Dolomanov et al., 2009)
- [11] INTERNATIONAL tables for X-Ray crystallography, 1974, Vol IV, Kynoch press, Birmingham, England.
- [12] ORTEP3 for Windows - L. J. Farrugia, *J. Appl. Crystallogr.* **1997**, *30*, 565.
